1 **Acute degradation reveals that Ran-Importin network dynamically polarizes and**  
2 **maintains HURP, but not NuMA, on human mitotic spindle**

3 Kenta Tsuchiya<sup>1#</sup>, Hisato Hayashi<sup>1#</sup>, Momoko Nishina<sup>1#</sup>, Masako Okumura<sup>1#</sup>, Masato T.  
4 Kanemaki<sup>2,3</sup>, Gohta Goshima<sup>1</sup>, Tomomi Kiyomitsu<sup>1,2\*</sup>

5

6 <sup>1</sup> Division of Biological Science, Graduate School of Science, Nagoya University,  
7 Chikusa-ku, Nagoya 464-8602, Japan.

8 <sup>2</sup> Precursory Research for Embryonic Science and Technology (PRESTO) Program,  
9 Japan Science and Technology Agency, 4-1-8 Honcho Kawaguchi, Saitama 332-0012,  
10 Japan.

11 <sup>3</sup> Department of Chromosome Science, National Institute of Genetics, Research  
12 Organization of Information and Systems (ROIS), and Department of Genetics,  
13 SOKENDAI (The Graduate University of Advanced Studies), Yata 1111, Mishima,  
14 Shizuoka 411-8540, Japan.

15

16 # These authors contributed equally to this work.

17 \* Corresponding author:

18 E-mail: [kiyomitsu@bio.nagoya-u.ac.jp](mailto:kiyomitsu@bio.nagoya-u.ac.jp)

19 Phone & Fax: +81-52-789-2938

20 Characters: 25,699 characters

21

22 **Abstract**

23 The chromosome-derived Ran-GTP gradient is believed to promote spindle assembly  
24 by releasing spindle assembly factors (SAFs) such as NuMA and HURP from inhibitory  
25 importins near chromosomes. The Ran-GTP gradient plays critical roles in meiosis, but  
26 how the Ran-based network spatiotemporally defines SAF localization and function in  
27 mitosis remains incompletely understood. Here, we systematically depleted RCC1  
28 (Ran-GEF), RanGAP1, and importin- $\beta$  using auxin-inducible degron (AID) technology in  
29 somatic human cells. We demonstrate that the Ran-Importin network does not  
30 substantially affect NuMA localization and functions at spindle poles. In contrast, the  
31 Ran-based network polarizes both HURP and importin- $\beta$  on K-fibers near  
32 chromosomes, where HURP, but not importin- $\beta$ , stabilizes microtubules. In addition,  
33 acute RCC1 degradation during metaphase reveals that HURP's K-fiber localization is  
34 dynamically maintained by Ran-GTP even after spindle assembly. Together, we  
35 propose that the Ran-Importin network locally promotes microtubule-binding and  
36 dissociation cycle of HURP, but not NuMA, to dynamically organize stable K-fibers near  
37 chromosomes in mitotic human cells.

38

39

40

41 **A condensed title** (50 characters)

42 Ran-based polarization of SAFs on human mitotic spindle

43

44

45 **Summary** (40 words)

46 Using auxin-inducible degron technology, we systematically analyzed the mechanisms  
47 of Ran-based polarization of spindle assembly factors on human mitotic spindles. We  
48 find that the Ran-based network dynamically polarizes and maintains HURP, but not  
49 NuMA, by promoting local microtubule binding-dissociation cycle.

50 (40 words)

51

52

53 **Highlights**

- 54 • Ran-GTP is dispensable for NuMA localization and function at spindle poles in mitotic  
55 human cells.
- 56 • Ran-Importin network is indispensable for HURP and importin- $\beta$  to accumulate at K-  
57 fibers near chromosomes.
- 58 • HURP, but not importin- $\beta$ , is required to stabilize K-fibers.
- 59 • HURP is dynamically maintained on K-fibers even after spindle assembly.

60

## 61 **Introduction**

62 To achieve accurate capture and segregation of chromosomes by spindle microtubules,  
63 chromosomes generate intracellular gradients that promote spindle assembly near  
64 chromosomes in both mitosis and meiosis (Heald and Khodjakov, 2015; Kalab and  
65 Heald, 2008). During animal mitosis, the chromosome-derived gradients and  
66 centrosome-dependent pathways coordinately regulate microtubule nucleation,  
67 polymerization/depolymerization, transport, sliding, and cross-linking to organize bipolar  
68 spindle structure (Goshima and Scholey, 2010; Petry, 2016; Walczak and Heald, 2008).  
69 In contrast, chromosome-derived signals play particularly dominant roles in spindle  
70 assembly during female meiosis as centrosomes are absent (Beaven et al., 2017;  
71 Bennabi et al., 2016; Mogessie et al., 2018).

72 Chromosome-derived signals consist of two distinct pathways - the Ran-GTP  
73 gradient and chromosome passenger complex (CPC)-based signals (Zierhut and  
74 Funabiki, 2015). The Ran-GTP gradient is generated by two spatially-separated  
75 opposing enzymes. Regulator of chromosome condensation 1 (RCC1), is a guanine  
76 nucleotide exchange factor (GEF) for Ran (Bischoff and Ponstingl, 1991) and localizes  
77 to chromosomes to convert the small GTPase Ran from its GDP- to GTP-bound form  
78 (Moore et al., 2002) (Fig. 1A). In contrast, RanGAP1, a GTPase-activating protein  
79 (GAP) for Ran, predominantly localizes to the cytoplasm to promote Ran's intrinsic  
80 GTPase activity (Bischoff et al., 1994) (Fig. 1A). The Ran-GTP gradient has been best  
81 characterized in meiotic *Xenopus* egg extracts, but is also found in other meiotic and  
82 mitotic cell types (Dumont et al., 2007; Hasegawa et al., 2013; Kalab et al., 2006;  
83 Moutinho-Pereira et al., 2013).

84 Pioneering work using *Xenopus* egg extracts established a model in which a  
85 chromosome-derived Ran-GTP gradient promotes spindle assembly by activating  
86 spindle assembly factors (SAFs) such as NuMA and TPX2 by releasing them from  
87 inhibitory importin proteins in the vicinity of chromosomes (Fig.1A) (Kalab and Heald,  
88 2008; Nachury et al., 2001; Wiese et al., 2001). At present, several other microtubule-  
89 binding proteins, such as HURP (Sillje et al., 2006), have been identified as spindle  
90 assembly factors that promote spindle assembly downstream of Ran-GTP gradient  
91 (Forbes et al., 2015). In addition to a role in spindle assembly, we previously  
92 demonstrated that the Ran-GTP gradient promotes spindle positioning by controlling the  
93 spatial organization of cortical proteins such as NuMA-LGN complex and Anillin in  
94 somatic human cells (Kiyomitsu and Cheeseman, 2012; Kiyomitsu and Cheeseman,  
95 2013).

96 In mitotic human cells, NuMA localizes to spindle poles and the cell cortex, where  
97 NuMA acts for spindle-pole focusing and astral microtubule capture/pulling,  
98 respectively, in cooperation with a microtubule motor dynein (Hueschen et al., 2017;  
99 Kiyomitsu, 2019; Okumura et al., 2018). Although the mechanisms remain unclear,  
100 cortical localization of NuMA-LGN complexes is negatively regulated by the  
101 chromosome-derived Ran-GTP gradient in a distance dependent manner (Kiyomitsu  
102 and Cheeseman, 2012). Similarly, NuMA is excluded from spindle microtubules near  
103 chromosomes, and accumulates around spindle poles. How Ran-GTP regulates the  
104 spindle localization of NuMA is also mysterious, but recent structural and *in vitro* studies  
105 demonstrated that importin- $\alpha/\beta$  recognizes nuclear localization signal (NLS) of NuMA,  
106 and sterically inhibits NuMA's 2<sup>nd</sup> microtubule-binding domain (Chang et al., 2017). The

107 authors predicted that NuMA would be liberated from importin- $\beta$  near chromosomes by  
108 Ran-GTP gradient and subsequently acts for spindle assembly (Chang et al., 2017).  
109 However, this model has not been rigorously tested with cell biological approaches. In  
110 addition, the significance of the Ran-GTP gradient for mitotic spindle assembly has  
111 been debated and appears to vary across cell types (Furuta et al., 2016; Hasegawa et  
112 al., 2013; Moutinho-Pereira et al., 2013).

113 To define the significance and mechanisms of Ran-based spindle assembly in  
114 mitotic cells, we sought to systematically deplete Ran-associated proteins in mitotic  
115 human cells using auxin-inducible degron (AID) technology (Natsume et al., 2016). We  
116 found that degradation of the Ran-based network does not substantially affect NuMA  
117 localization or function at spindle poles. In sharp contrast, Ran-GTP polarizes both  
118 HURP and importin- $\beta$  on kinetochore-fibers (K-fibers) near chromosomes, where HURP  
119 and importin- $\beta$  have distinct roles in K-fiber stabilization. Furthermore, we first  
120 demonstrated that HURP is dynamically maintained on K-fibers after spindle assembly.  
121 Based on our findings, we propose a local cycling model in which the Ran-based  
122 network promotes a local microtubule binding-dissociation cycle of HURP to  
123 dynamically organize stable K-fibers near chromosomes.

124

## 125 **Results**

### 126 **Ran-Importin network does not substantially affect spindle-pole localization of** 127 **NuMA in human cells**

128 NuMA is required for mitotic spindle assembly in mammalian cells (Gaglio et al., 1995;  
129 Hueschen et al., 2017; Okumura et al., 2018; Silk et al., 2009), and has been proposed  
130 to be regulated by Ran-GTP (Chang et al., 2017; Nachury et al., 2001; Wiese et al.,  
131 2001). However, how the chromosome-derived Ran-GTP gradient regulates NuMA's  
132 spindle-pole localization is poorly understood in mitotic human cells. To address this, we  
133 sought to systematically deplete RCC1 (RanGEF), RanGAP1, and importin- $\beta$  using  
134 auxin-inducible degron (AID) technology (Fig. 1A-B) (Natsume et al., 2016). We  
135 introduced a C-terminal mAID-mClover (mAC) tag into both alleles of either RCC1,  
136 RanGAP1, or importin- $\beta$  at their genomic loci (Fig. 1C-E and Fig. S1A, D, G) in parental  
137 tet-OsTIR1 HCT116 cells that conditionally express OsTIR1 following the addition of  
138 doxycycline (Dox) (Fig. 1B) (Natsume et al., 2016). To visualize endogenous NuMA in  
139 living cells, we integrated an mCherry tag into both alleles of the NuMA genomic locus  
140 (Fig. 1C-E and S1B-C, E-F, H-I). As expected, RCC1-mAC accumulated on mitotic  
141 chromosomes (Fig. 1C top) (Moore et al., 2002), whereas RanGAP1-mAC localized to  
142 the cytoplasm and was excluded from chromosomes with weak accumulation at  
143 kinetochores (Fig. 1D top)(Joseph et al., 2002). NuMA-mCherry localized to the spindle  
144 poles in metaphase (Fig. 1C-E) (Compton et al., 1992; Kiyomitsu and Cheeseman,  
145 2012). Unexpectedly, we found that endogenous importin- $\beta$ -mAC was detected not only  
146 in cytoplasm, but also at the chromosome-proximal region of bundled kinetochore-  
147 microtubules (K-fibers) in living cells (Fig. 1E top, S1J). Although this contrasts with

148 spindle-pole localization of importin- $\beta$  observed using pre-extracted fixed cells  
149 (Ciciarello et al., 2004), the K-fiber localization of importin- $\beta$  was not a consequence of  
150 mAC tagging, as we observed K-fiber localization after immunostaining for endogenous  
151 importin- $\beta$  (Fig. S1K).

152 To understand how NuMA is regulated by the Ran-Importin network (Fig. 1A), we  
153 next depleted RCC1, RanGAP1, or importin- $\beta$  by treatment with Dox and auxin (IAA).  
154 After 20-24 hrs, the fluorescence intensities of mAC-tagged RCC1, RanGAP1, and  
155 importin- $\beta$  were reduced to undetectable levels (Fig. 1C-E bottom), although some  
156 populations of cells still displayed fluorescent signals, likely due to heterogeneous  
157 induction of OsTIR1 (see cells with \* in Fig. 1E bottom). Importantly, degradation of  
158 either RCC1, RanGAP1, or importin- $\beta$  did not substantially affect the spindle-pole  
159 localization of NuMA at metaphase (Fig. 1C-E). These results indicate that the Ran-  
160 importin network is dispensable for spindle-pole localization of NuMA in cultured human  
161 cells.

162

### 163 **NuMA acts for spindle-pole focusing independently of RCC1**

164 NuMA depletion causes spindle-pole focusing defects in human cells (Hueschen et al.,  
165 2017; Okumura et al., 2018). Given that RCC1 depletion did not substantially affect  
166 spindle bipolarity (Fig. 1C, F), NuMA is still functional at spindle poles in the absence of  
167 RCC1. To confirm this, we next co-depleted RCC1 and NuMA. We integrated mAID-  
168 mCherry tag into both alleles of the NuMA genomic locus in the parental RCC1-mAC  
169 cell line (Fig. 1G and S1L). As expected, co-depletion of RCC1 and NuMA caused  
170 defects in spindle-pole focusing and/or bipolar spindle formation (Fig. 1F, 1G bottom,



171 and Fig. S1M). These results indicate that NuMA is still functional for spindle-pole  
172 focusing in the absence of Ran-GTP in mitotic human cells.

173

174 **Degradation of RCC1 during prometaphase does not substantially affect**  
175 **localization and function of NuMA at spindle poles**

176 NuMA is transported into the nucleus via its nuclear localization signal (NLS) during  
177 interphase (Fig. 2A, see cells with (+) (Chang et al., 2017; Tang et al., 1994). In the  
178 interphase nucleus, NuMA is likely released from importins by nuclear Ran-GTP.

179 Because we found that NuMA is maintained in the nucleus following RCC1 degradation  
180 in interphase (Fig. 2A, see cells with (-), Fig. 2B, t = -1:35 and -0:15), this raises another  
181 possibility that the majority of NuMA is maintained as an active form free from importin- $\beta$   
182 in the nucleus and works properly in the subsequent mitosis in RCC1-depleted cells  
183 (Fig. 1). To exclude this possibility, we next depleted RCC1 in nocodazole-arrested cells  
184 and analyzed the phenotypes following nocodazole washout (Fig. 2C).

185 In RCC1-positive control cells, NuMA localized diffusely to the cytoplasm during  
186 nocodazole arrest (Fig. 2D, t = -90), but rapidly accumulated near chromosome masses  
187 within 10 min following nocodazole washout (Fig. 2D, t = 10). NuMA localized at the  
188 poles of metaphase spindles within 60 min (Fig. 2D, t = 60) and entered the nucleus  
189 following mitotic exit (Fig. 2D, t = 85). Following nocodazole washout, NuMA also  
190 displayed punctate foci in the cytoplasm (Fig. 2D, t = 10), which were rarely observed in  
191 normal prometaphase cells (Fig. 2A t = 0:05) and disappeared during spindle assembly  
192 (Fig. 2D, t = 60). Importantly, NuMA behaved similarly when RCC1 was degraded  
193 during nocodazole arrest. RCC1-mAC signals were detectable on chromosome masses

194 in nocodazole-arrested cells (Fig. 2E, t = -90), and were reduced to undetectable levels  
195 after the addition of IAA (Fig. 4E, t = 0). NuMA accumulated near chromosome masses  
196 within 10 min following nocodazole washout (Fig. 2E, t = 10), and localized to spindle  
197 poles around 60 min (Fig. 2E, t = 55). Although cortical NuMA signals appeared to be  
198 reduced, RCC1-depleted cells entered anaphase with similar timing (Fig. 2E, t = 70, Fig.  
199 2G). In addition, even if RCC1 was degraded before the addition of IAA due to a basal  
200 activity of OsTIR1 (Fig. 2F, see cells indicated by (3) at t = -90, Fig. S2A) (Yesbolatova  
201 et al., 2019), there were no significant differences in timing for bipolar spindle assembly  
202 and mitotic exit (Fig. 2F-G, Fig. S2A). These results indicate that RCC1 is dispensable  
203 for NuMA localization and function at spindle poles even if RCC1 is degraded during  
204 mitosis.

205

### 206 **RCC1 regulates kinetochore-fiber localization of HURP and importin- $\beta$**

207 The above results indicate that RCC1 is dispensable for localization and function of  
208 NuMA at spindle poles. However, RCC1 depletion in asynchronous cultures caused  
209 shorter mitotic spindle (Fig. 1C, 2A-B, 3A), suggesting that Ran-GTP plays roles for  
210 proper spindle assembly in somatic human cells. To identify spindle assembly factors  
211 downstream of RCC1, we next analyzed the localization of TPX2 (Gruss et al., 2001)  
212 and HURP (Sillje et al., 2006), since these proteins are well-recognized as Ran-  
213 regulated spindle assembly factors. TPX2 localized to spindle microtubules in  
214 metaphase (Fig. 3B top). However, the localization of TPX2 was virtually unaffected in  
215 RCC1-depleted cells (Fig. 3B and Fig. S3A) as observed for NuMA (Fig. 1C). In sharp  
216 contrast, K-fiber accumulation of HURP was completely abolished following RCC1

217 depletion (Fig. 3C and Fig. S3B). HURP localized diffusely in the cytoplasm with weak  
218 accumulation on the spindle in RCC1-depleted cells (Fig. 3C). Because HURP directly  
219 interacts with importin- $\beta$  (Sillje et al., 2006) and co-localized with importin- $\beta$  at K-fibers  
220 (Fig. S1K), we next analyzed the localization of importin- $\beta$ . As observed for HURP, the  
221 K-fiber localization of importin- $\beta$  was diminished in RCC1-depleted cells (Fig. 3D and  
222 Fig. S3C). These results suggest that the chromosome-derived Ran-GTP gradient acts  
223 primarily to target HURP and importin- $\beta$  near chromosomes, but not NuMA and TPX2  
224 around spindle poles, in cultured human cells.

225

### 226 **HURP, but not importin- $\beta$ , is required to stabilize K-fibers**

227 HURP is required to stabilize K-fibers (Sillje et al., 2006). To understand the relationship  
228 between HURP and importin- $\beta$  for their K-fiber localization and function, we next  
229 targeted endogenous HURP by introducing a mAID-mClover-3xFLAG (mACF) tag (Fig.  
230 4A and Fig. S4A-C). Endogenous HURP-mACF accumulated at K-fibers near  
231 chromosomes (Fig. 4A) as observed with anti-HURP antibodies (Sillje et al., 2006).  
232 HURP depletion resulted in diminished importin- $\beta$  localization to K-fibers (Fig. 4A-B) and  
233 reduced mitotic spindle length (Fig. 4C). Because K-fibers are resistant to cold  
234 treatment (Sillje et al., 2006), we next incubated cells with ice-cold medium for 20 min  
235 and analyzed cold-stable microtubules. HURP localized to cold-stable microtubules  
236 (Fig. 4D, top), which was disrupted by HURP depletion (Fig. 4D bottom), consistent with  
237 the previous study (Sillje et al., 2006).

238 We next depleted importin- $\beta$  and analyzed its effects on HURP and K-fibers (Fig.  
239 4E, S4D). Importin- $\beta$  depletion caused a remarkable relocalization of HURP from K-

240 fibers near chromosomes to spindle microtubules (Fig. 4E-F). Although K-fiber  
241 localization of HURP was unclear in importin- $\beta$  depleted cells due to the relative  
242 accumulation of HURP on spindle microtubules around spindle poles (Fig. 4E bottom),  
243 HURP was clearly detected on cold-stable K-fibers in importin- $\beta$  depleted cells (Fig.  
244 4G). These results suggest that HURP acts for K-fiber stabilization independently of  
245 importin- $\beta$ .

246

### 247 **HURP and importin- $\beta$ localize throughout the spindle in RanGAP1-depleted cells**

248 Whereas HURP and importin- $\beta$  have different roles for K-fiber stabilization (Fig. 4D, G),  
249 both proteins accumulate at K-fibers near chromosomes downstream of RCC1 (Fig. 3C-  
250 D). To comprehensively understand mechanisms of Ran-based spatial regulation of  
251 HURP and importin- $\beta$ , we next analyzed the behaviors of HURP and importin- $\beta$  in  
252 RanGAP1-depleted cells, in which Ran-GTP should exist throughout cells. RanGAP1  
253 degradation did not cause clear phenotypes in spindle length (Fig. 4H-I, Fig. S4E).  
254 However, both HURP and importin- $\beta$  localized throughout the spindle with increased  
255 intensities in RanGAP1-depleted cells (Fig. 4H-I, Fig. S4F). These results suggest that  
256 HURP and importin- $\beta$  behave together and preferentially interact with microtubules in  
257 the presence of Ran-GTP (Fig. 4J).

258

### 259 **RCC1 is required to maintain HURP's K-fiber localization during metaphase**

260 Based on our results, we constructed a revised model for the control of spindle  
261 assembly downstream of the Ran-GTP gradient (Fig. 4J). In this model, importin- $\beta$

262 globally inhibits HURP's microtubule-binding activity by masking HURP's 2<sup>nd</sup> microtubule-  
263 binding domain (MTBD2) (Sillje et al., 2006; Song et al., 2014), and the chromosome-  
264 derived Ran-GTP gradient locally dissociates HURP from importin- $\beta$  resulting in the  
265 activation of HURP near chromosomes (Fig. 4J). In this model, Ran-GTP and importin-  
266  $\beta$  underlie a dynamic cycle of HURP's microtubule binding and dissociation near  
267 chromosomes. To test this model and whether this is valid after the spindle has already  
268 assembled, we next sought to acutely degrade RCC1 during metaphase by combining  
269 AID-mediated degradation with APC/C inhibitors (Fig. 5A). Cells were synchronized in  
270 G2 using RO-3306 (Vassilev et al., 2006) and released in the medium containing the  
271 APC/C inhibitors, Apcin and proTAME (Sackton et al., 2014), to arrest cells at  
272 metaphase without inhibiting the proteasome. RCC1-mAC signals were reduced to  
273 undetectable level by 60-90 min following the addition of IAA under metaphase-arrested  
274 condition (Fig. 5B). In the presence of RCC1, HURP-mCherry accumulated on K-fibers  
275 near chromosomes (Fig. 5B, t = -5 and 30). In contrast, following the degradation of  
276 RCC1, HURP weakly localized throughout the spindle (Fig. 5B, t= 60 and 90).  
277 Interestingly, spindle length was not substantially affected during this process (Fig. 5B-  
278 C, compare t = -5 with t = 60 min), suggesting that K-fiber stabilization by HURP  
279 contributes to spindle length regulation primarily during prometaphase. Together, these  
280 results support our model (Fig. 4J) and further indicate that the Ran-based network  
281 dynamically maintains HURP's K-fiber localization even after the spindle is assembled.

282

283 **Discussion**

284 **NuMA acts for spindle-pole focusing independently of the Ran-importin network**  
285 **in cultured human cells**

286 In the prevailing models (Fig. 1A), all SAFs including NuMA, TPX2, and HURP are  
287 expected to be similarly regulated by the chromosome-derived Ran-GTP gradient  
288 (Chang et al., 2017). However, SAFs localize and function at different locations on the  
289 spindle: NuMA accumulates around spindle poles distant from chromosomes (Fig.1C),  
290 whereas HURP localizes to K-fibers near chromosomes (Fig.3C, Fig. 6). Consistent with  
291 this distinct spatial localization, we demonstrated that the Ran-based network is  
292 dispensable for the localization and functions of NuMA (Fig. 1C-G, Fig. 2D-G), but is  
293 indispensable for HURP (Fig. 3C, 4E, 4H), in mitotic human cells. Considering mitotic  
294 arrest and abnormal spindle phenotypes caused by TPX2 depletion (Garrett et al.,  
295 2002; Kufer et al., 2002) (T.K. unpublished results), majority of TPX2 would also be  
296 functional even in the absence of Ran-GTP in mitotic human cells (Fig. 3B). Although  
297 we do not exclude the possibility that Ran-GTP liberates NuMA and TPX2 from  
298 importin- $\beta$  near chromosomes, this contribution must be very minor in mitotic human  
299 cells. In mitotic cells, centrosomes act as a major microtubule-nucleation sites and  
300 recruit multiple signaling molecules including kinases. Other parallel pathways derived  
301 from centrosomes may act to liberate NuMA from inhibitory importins and make the  
302 Ran-GTP gradient dispensable for NuMA in mitosis. From this point of view, NuMA may  
303 be more potently regulated by Ran-GTP in human oocyte, in which Ran-GTP plays a  
304 dominant role in assembling meiotic spindle independently of centrosomes (Holubcova  
305 et al., 2015).

306

307 **The Ran-based network dynamically polarizes and maintains HURP on K-fibers**  
308 **near chromosomes**

309 In contrast to NuMA, we demonstrated that HURP is dynamically regulated by the Ran-  
310 based network in mitotic human cells (Fig. 3C, 4E, H). Although HURP has been  
311 identified previously as a downstream target of Ran-GTP (Sillje et al., 2006), we found  
312 that HURP additionally colocalizes with importin- $\beta$  on K-fibers near chromosomes (Fig.  
313 S1K, Fig. 4A, E), and acts for K-fiber stabilization independently of importin- $\beta$  (Fig. 4D,  
314 G). In addition, we demonstrated that HURP is dynamically maintained on K-fibers after  
315 spindle assembly downstream of Ran-GTP (Fig. 5B). Based on our results, we propose  
316 a local cycling model for the establishment and maintenance of HURP's polarized  
317 localization to spindle microtubules (Fig. 6). After nuclear envelope break down (NEBD),  
318 HURP strongly interacts with microtubules through its two microtubule binding domains  
319 (MTBD1 and MTBD2) (Sillje et al., 2006; Song et al., 2014) (Fig. 6-a). Importin- $\beta$  binds  
320 to the HURP on microtubules, and then dissociates HURP from the microtubules (Fig.  
321 6-b) because importin- $\beta$  masks HURP's 2<sup>nd</sup> microtubule binding domain (MTBD2) (Song  
322 et al., 2014). However, in the vicinity of chromosomes, chromosome-derived Ran-GTP  
323 releases HURP from importin- $\beta$  (Sillje et al., 2006) (Fig. 6-c), and the liberated HURP  
324 quickly interacts with microtubules around chromosomes (Fig.6-d). As importin- $\beta$  is  
325 diffusively localized throughout cells (Fig. 4A, E), importin- $\beta$  again binds and dissociates  
326 the HURP from microtubules near chromosomes (Fig. 6-e), but Ran-GTP again  
327 releases HURP from importin- $\beta$  (Fig. 6-c). By repeating this local binding-dissociation  
328 cycle (Fig 6 c-d-e), HURP, but not importin- $\beta$ , would act to stabilize microtubules and

329 generates stable K-fibers (Fig. 4D, G). This dynamic property would be suitable for  
330 bundling short microtubules nucleated around kinetochores (Sikirzhytski et al., 2018)  
331 and for coupling HURP's polarized localization with microtubule flux on the mitotic  
332 spindle.

333

### 334 **A new toolkit and mitosis-specific degradation assays to dissect mitotic roles of** 335 **Ran-importin network**

336 To define mitotic functions of the Ran-based network, it is critical to inactivate the  
337 network specifically during mitosis due to its central role in nuclear-cytoplasmic  
338 transport during interphase. Previously, tsBN2, a temperature-sensitive RCC1 mutant  
339 hamster cell line (Nishimoto et al., 1978), and a small molecule inhibitor, importazole  
340 (Soderholm et al., 2011), have been developed to acutely inhibit functions of RCC1 or  
341 importin- $\beta$ , respectively. Here, we established three human cell lines for RCC1,  
342 RanGAP1 and importin- $\beta$  using AID technology (Natsume et al., 2016), that allowed us  
343 to systematically deplete the Ran-Importin network in human cells. Importantly, by  
344 combining nocodazole or APC/C inhibitors, we succeeded in degrading the Ran-based  
345 network specifically in prometaphase (Fig. 2C-F) or metaphase (Fig. 5A-B),  
346 respectively. Given that spindle length was virtually unaffected by RCC1 degradation at  
347 metaphase (Fig. 5B-C), HURP-based K-fiber stabilization would act during  
348 prometaphase to define proper spindle length. Because there are many other mitotic  
349 proteins regulated downstream of Ran-GTP (Forbes et al., 2015; Kiyomitsu and  
350 Cheeseman, 2012; Kiyomitsu and Cheeseman, 2013), these AID-cell lines will be useful  
351 to dissect these downstream functions. In addition, as this AID-mediated mitotic



352 degradation can be applicable for other multi-functional proteins such as dynein and  
353 NuMA (Natsume et al., 2016; Okumura et al., 2018), these new assays will further  
354 provide novel insights into mechanisms and roles of spindle assembly and maintenance  
355 in animal cells.

356

357 **Acknowledgments**

358 We thank I. M. Cheeseman for critical reading of the manuscript, R. Inaba, and K.  
359 Murase for technical assistance. This work was supported by grants from PRESTO  
360 program (JPMJPR13A3) of the Japan Science and Technology agency (JST) for T.K, a  
361 Career Development Award of the Human Frontier Science Program (CDA00057/2014-  
362 C) for T.K., KAKENHI (16K14721 and 17H05002 for T.K, 17H01431 for G.G.) of the  
363 Japan Society for Promotion of Science (JSPS), NIG-JOINT (2014B-B-3, 2015-A1-19,  
364 2016-A1-22 for T.K.) of National Institute of Genetics (NIG), and the Naito Foundation  
365 for T.K.

366

367 **Author contributions**

368 Conceptualization, T.K ; Investigation, T.K., K.T., H.H., M.N., and M.O ; Formal  
369 analysis, T.K and K.T ; Methodology, T.K. and M.K ; Writing, T.K ; Supervision, T.K and  
370 G.G ; Funding Acquisition, T.K., M.K and G.G.

371

372 **Declaration of interests**

373 The authors declare no competing interests.

374

375

## 376 **Materials and methods**

377

### 378 • Plasmid Construction

379 Plasmids for CRISPR/Cas9-mediated genome editing and auxin-inducible degra-  
380 were constructed according to the protocol described in Natsume et al., (Natsume et  
381 al., 2016) and Okumura et al., (Okumura et al., 2018). To construct donor plasmids  
382 containing homology arms for RCC1 (~500-bp homology arms), RanGAP1 (~500-bp  
383 arms), importin- $\beta$  (~500-bp homology arms), HURP (~200-bp homology arms), and  
384 TPX2 (~200-bp homology arms), gene synthesis services from Eurofins Genomics  
385 K.K. (Tokyo, Japan) or Genewiz (South Plainsfield, NJ) were used for RCC1 and  
386 others, respectively. Plasmids and sgRNA sequences used in this study are listed in  
387 Supplementary Tables S1 and S2, and will be deposited to Addgene.

388

### 389 • Cell Culture, Cell Line Generation and Antibodies

390 HCT116 cells were cultured as described previously (Okumura et al., 2018). Knock-in  
391 cell lines were generated according to the procedures described in Okumura et al.,  
392 (Okumura et al., 2018). To activate the auxin-inducible degradation, cells were treated  
393 with 2  $\mu$ g/mL Dox and 500  $\mu$ M indoleacetic acid (IAA) for 20–24 h. Cells with  
394 undetectable signals for mAID-fusion proteins were analyzed. The cell lines and  
395 primers used in this study are listed in Tables S1 and S3, respectively.

396 Antibodies against tubulin (DM1A, Sigma-Aldrich, 1:2,000), NuMA (Abcam,  
397 1:1,000), RCC1 (Cell Signaling Technology, D15H6, Rabbit mAb, 1:100), RanGAP1  
398 (Santa Cruz Biotechnology, H-180, 1:200), importin- $\beta$  (GeneTex, 3E9 Mouse mAb,  
399 1:100), and HURP (E. Nigg laboratory, 1 : 200) were used for western blotting. For  
400 RCC1 immunoblots, the membrane was incubated with the anti-RCC1 antibody  
401 overnight at 4 °C.

402

### 403 • Microscope System

404 Imaging was performed using spinning-disc confocal microscopy with a 60 $\times$  1.40  
405 numerical aperture objective lens (Plan Apo  $\lambda$ , Nikon, Tokyo, Japan). A CSU-W1  
406 confocal unit (Yokogawa Electric Corporation, Tokyo, Japan) with five lasers (405, 488,  
407 561, 640, and 685 nm, Coherent, Santa Clara, CA) and an ORCA-Flash4.0 digital  
408 CMOS camera (Hamamatsu Photonics, Hamamatsu City, Japan) were attached to an  
409 ECLIPSE Ti-E inverted microscope (Nikon) with a perfect focus system. DNA images  
410 in Figure 2A/B or Figure 4D/G were obtained using either SOLA LED light engine  
411 (Lumencor, Beaverton, OR) or 405 nm laser, respectively.

412

### 413 • Immunofluorescence and Live Cell Imaging

414 For immunofluorescence in Figure S1K, HURP-mACF cells were fixed with PBS  
415 containing 3% paraformaldehyde and 2% sucrose for 10 min at room temperature.  
416 Fixed cells were permeabilized with 0.5% Triton X-100™ for 5 min on ice, and  
417 pretreated with PBS containing 1% BSA for 10 min at room temperature after washing  
418 with PBS. Importin- $\beta$  was visualized using the anti-importin- $\beta$  antibody (1:500).  
419 Images of multiple z-sections were acquired by spinning-disc confocal microscopy  
420 using 0.5- $\mu$ m spacing and camera binning 2. Maximally projected images from 3 z-  
421 sections were shown.

422 For live cell imaging, cells were cultured on glass-bottomed dishes  
423 (CELLview™, #627860 or #627870, Greiner Bio-One, Kremsmünster, Austria) and  
424 maintained in a stage-top incubator (Tokai Hit, Fujinomiya, Japan) to maintain the  
425 same conditions used for cell culture (37 °C and 5% CO<sub>2</sub>). In most cases, three to five  
426 z-section images using 0.5-µm spacing were acquired and single z-section images  
427 were shown, unless otherwise specified. Microtubules was stained with 50 nM SiR-  
428 tubulin or SiR700-tubulin (Spirochrome) for >1 h prior to image acquisition. DNA was  
429 stained with 50 ng/mL Hoechst® 33342 (Sigma-Aldrich) or 20 nM SiR-DNA  
430 (Spirochrome) for > 1 h before observation. To visualize SNAP-tagged HURP in Fig.  
431 4E, cells were incubated with 0.1 µM TMR-Star (New England BioLabs) for > 2 h, and  
432 TMR-Star were removed before observation. To optimize image brightness, same  
433 linear adjustments were applied using Fiji and Photoshop.

434

435 • Prometaphase degradation assay and nocodazole washout

436 To degrade mAID-tagged proteins during nocodazole arrest, cells were treated with 2  
437 µg/mL Dox and 3.3 µM nocodazole at the indicated times (Fig. 2C). Five hours after  
438 the addition of nocodazole, cell culture dishes were moved to the stage of a  
439 microscope equipped with a peristaltic pump (SMP-21S, EYELA, Tokyo Rikakikai).  
440 Two z-section images were acquired using 2 µm spacing at three different (X.Y)  
441 positions and at 5 min intervals, with 500 µM IAA added during the first interval. After  
442 90 min, the nocodazole-containing medium was completely replaced with fresh  
443 medium using the peristaltic pump at a velocity of 20 sec/ml for 15 min. Images were  
444 acquired for a further 2 h and maximum intensity projection images are shown in  
445 Figure 2D-F.

446

447 • Metaphase degradation assay

448 To degrade mAID-tagged proteins in metaphase-arrested cells, the cells were treated  
449 with 50 µM Apcin (I-444, Boston Biochem) and 20 µM proTAME (I-440, Boston  
450 Biochem) at the indicated times (Fig. 5A). Three z-section images were acquired using  
451 1 µm spacing at six different (X.Y) positions and at 5 min intervals, with 500 µM IAA  
452 added during the first interval. Maximum intensity projection images are shown in  
453 Figure 5B.

454

455 • Cold treatment assay

456 To increase the number of cells in metaphase, cells were treated with 20 µM MG132  
457 (C2211, Sigma-Aldrich) for 90 min. To visualize SNAP-tagged HURP (Fig. 4G), cells  
458 were incubated with 0.1 µM TMR-Star (S9105S, New England BioLabs) for at least  
459 30 min. Before fixation, cells were incubated in ice-cold medium for 20 min (Sillje et  
460 al., 2006) to depolymerize non-kinetochore microtubules.

461

462 • Statistical Analysis

463 To determine the significance of differences between the mean values obtained for  
464 two experimental conditions, Welch's *t*-tests (Prism 6; GraphPad Software, La Jolla,  
465 CA) or a Z-test for proportions (Allto Consulting, Leeds, UK) were used as indicated  
466 in the figure legends.

467

468 **Table S1: Cell lines used in this study.**

| No. | Name                         | Description                                                                                          | Clo<br>ne<br>No. | Plasmids used                       | Par<br>ent<br>al<br>cell | Reference              |
|-----|------------------------------|------------------------------------------------------------------------------------------------------|------------------|-------------------------------------|--------------------------|------------------------|
| 1   | HCT116 tet-OsTIR1            | AAVS1::PTRE3G OsTIR1 (Puro)                                                                          |                  | pAAVS1 T2 and MK243 (Addgene#72835) |                          | (Natsume et al., 2016) |
| 2   | RCC1-mAC                     | AAVS1::PTRE3G OsTIR1 (Puro), RCC1::RCC1-mAID-mClover (Neo)                                           | 1                | pTK361+ pHH45                       | 1                        | This study             |
| 3   | RCC1-mAC + NuMA-mCh          | AAVS1::PTRE3G OsTIR1 (Puro), RCC1::RCC1-mAID-mClover (Neo), NuMA1::NuMA-mCh (Hygro)                  | 1                | pTK372+ pTK435                      | 2                        | This study             |
| 4   | RanGAP1-mAC                  | AAVS1::PTRE3G OsTIR1 (Puro), RanGAP1::RanGAP1-mAID-mClover (Neo)                                     | 9                | pHH49 + pHH51                       | 1                        | This study             |
| 5   | RanGAP1-mAC + NuMA-mCh       | AAVS1::PTRE3G OsTIR1 (Puro), RanGAP1::RanGAP1-mAID-mClover (Neo), NuMA1::NuMA-mCh (Hygro)            | 5                | pTK372+ pTK435                      | 4                        | This study             |
| 6   | importin-β-mAC               | AAVS1::PTRE3G OsTIR1 (Puro), importin-β::importin-β-mAID-mClover (Neo)                               | 7                | pHH50 + pHH57                       | 1                        | This study             |
| 7   | importin-β-mAC + NuMA-mCh    | AAVS1::PTRE3G OsTIR1 (Puro), importin-β::importin-β-mAID-mClover (Neo), NuMA1::NuMA-mCh (Hygro)      | 1                | pTK372+ pTK435                      | 6                        | This study             |
| 8   | RCC1-mAC + importin-β-mCh    | AAVS1::PTRE3G OsTIR1 (Puro), RCC1::RCC1-mAID-mClover (Neo), NuMA1::NuMA-mCh (Hygro)                  | 6                | pHH50 +pTK481                       | 2                        | This study             |
| 9   | RCC1-mAC + HURP-mCh          | AAVS1::PTRE3G OsTIR1 (Puro), RCC1::RCC1-mAID-mClover (Neo), HURP::HURP-mCh (Hygro)                   | 8                | pTK532+ pTK541                      | 2                        | This study             |
| 10  | RCC1-mAC + TPX2-mCh          | AAVS1::PTRE3G OsTIR1 (Puro), RCC1::RCC1-mAID-mClover (Neo), TPX2::TPX2-mCh (Hygro)                   | 1                | pTK527+ pTK502                      | 2                        | This study             |
| 11  | RanGAP1-mAC + HURP-mCh       | AAVS1::PTRE3G OsTIR1 (Puro), RanGAP1::RanGAP1-mAID-mClover (Neo), HURP::HURP-mCh (Hygro)             | 5                | pTK532+ pTK541                      | 4                        | This study             |
| 12  | RanGAP1-mAC + importin-β-mCh | AAVS1::PTRE3G OsTIR1 (Puro), RanGAP1::RanGAP1-mAID-mClover (Neo), importin-β::importin-β-mCh (Hygro) | 12               | pHH50 +pTK481                       | 4                        | This study             |
| 13  | importin-β-mAC + HURP-SNAP   | AAVS1::PTRE3G OsTIR1 (Puro), importin-β::importin-β-mAID-mClover (Neo), HURP::HURP-SNAP (Hygro)      | 3                | pTK532+ pTK589                      | 6                        | This study             |
| 14  | HURP-mACF                    | AAVS1::PTRE3G OsTIR1 (Puro), HURP::HURP-mAID-mClover-3FLAG (Neo)                                     | 13               | pTK532+ pTK596                      | 1                        | This study             |
| 15  | HURP-mACF + importin-β-mCh   | AAVS1::PTRE3G OsTIR1 (Puro), HURP::HURP-mAID-mClover-3FLAG (Neo), importin-β::importin-β-mCh (Hygro) | 14               | pHH50 +pTK481                       | 14                       | This study             |

469

470

471 **Table S2: sgRNA sequences for CRISPR/Cas9-mediated genome editing**

| Gene locus                     | sgRNA (5'-3')        | PAM | Plasmid Name                  |
|--------------------------------|----------------------|-----|-------------------------------|
| NuMA1 (C-terminus)             | gtggggccactcactggtac | tgg | pTK372 (Okumura et al., 2018) |
| RCC1 (C-terminus)              | gactgtatgctggccccgc  | tgg | pTK361                        |
| RanGAP1 (C-terminus)           | tctgctgcagacgctgtaca | agg | pHH49                         |
| importin- $\beta$ (C-terminus) | agttcgagccgccgcccga  | agg | pHH50                         |
| HURP                           | caaaattctcctggtgtag  | agg | pTK532                        |
| TPX2                           | tgccgataccgccggcaat  | ggg | pTK527                        |

472

473 **Table S3: PCR primers to confirm gene editing**

| Gene              | Primer sequence           | Primer name | Figures                   |
|-------------------|---------------------------|-------------|---------------------------|
| RCC1              | gaatgccattccaggcag        | oHH88       | Figure S1A                |
| RCC1              | ttctgcacgttctctgg         | oHH89       | Figure S1A                |
| NUMA1             | gagcctcaaagaaggccc        | oTK542      | Figure S1B, S1E, S1H      |
| NUMA1             | agcaggaaccaggcctac        | oTK566      | Figure S1B, S1E, S1H      |
| RanGAP1           | gctgccgcaggaccaggctggtg   | oHH93       | Figure S1D                |
| RanGAP1           | attccctggcctatgtctgctggaa | oHH94       | Figure S1D                |
| HURP              | ctcttgatggatacttactg      | oTK749      | Figure S3B, S4A, S4D, S4F |
| HURP              | cccttgagaaagagtatatcta    | oTK750      | Figure S3B, S4A, S4D, S4F |
| importin- $\beta$ | ggagtaaggagtttgagagtatcg  | oHH97       | Figure S1G, S3C, S4C, S4F |
| importin- $\beta$ | aatcttctctagagctaggcaacg  | oHH98       | Figure S1G, S3C, S4C, S4F |
| TPX2              | tctgacatccctctactg        | oTK660      | Figure S3A                |
| TPX2              | ggagtctaatcgagacattc      | oTK661      | Figure S3A                |

474

475

## 476 References

477

- 478 Beaven, R., R.N. Bastos, C. Spanos, P. Rome, C.F. Cullen, J. Rappsilber, R. Giet, G. Goshima, and H. Ohkura.  
479 2017. 14-3-3 regulation of Ncd reveals a new mechanism for targeting proteins to the spindle in oocytes. *J*  
480 *Cell Biol.* 216:3029-3039.
- 481 Bennabi, I., M.E. Terret, and M.H. Verlhac. 2016. Meiotic spindle assembly and chromosome segregation in  
482 oocytes. *J Cell Biol.* 215:611-619.
- 483 Bischoff, F.R., C. Klebe, J. Kretschmer, A. Wittinghofer, and H. Ponstingl. 1994. RanGAP1 induces GTPase  
484 activity of nuclear Ras-related Ran. *Proc Natl Acad Sci U S A.* 91:2587-2591.
- 485 Bischoff, F.R., and H. Ponstingl. 1991. Catalysis of guanine nucleotide exchange on Ran by the mitotic regulator  
486 RCC1. *Nature.* 354:80-82.
- 487 Chang, C.C., T.L. Huang, Y. Shimamoto, S.Y. Tsai, and K.C. Hsia. 2017. Regulation of mitotic spindle assembly  
488 factor NuMA by Importin-beta. *J Cell Biol.* 216:3453-3462.
- 489 Ciciarello, M., R. Mangiacasale, C. Thibier, G. Guarguaglini, E. Marchetti, B. Di Fiore, and P. Lavia. 2004.  
490 Importin beta is transported to spindle poles during mitosis and regulates Ran-dependent spindle assembly  
491 factors in mammalian cells. *J Cell Sci.* 117:6511-6522.
- 492 Compton, D.A., I. Szilak, and D.W. Cleveland. 1992. Primary structure of NuMA, an intranuclear protein that  
493 defines a novel pathway for segregation of proteins at mitosis. *J Cell Biol.* 116:1395-1408.
- 494 Dumont, J., S. Petri, F. Pellegrin, M.E. Terret, M.T. Bohnsack, P. Rassinier, V. Georget, P. Kalab, O.J. Gruss, and  
495 M.H. Verlhac. 2007. A centriole- and RanGTP-independent spindle assembly pathway in meiosis I of  
496 vertebrate oocytes. *J Cell Biol.* 176:295-305.
- 497 Forbes, D.J., A. Travesa, M.S. Nord, and C. Bernis. 2015. Reprint of "Nuclear transport factors: global regulation of  
498 mitosis". *Curr Opin Cell Biol.* 34:122-134.
- 499 Furuta, M., T. Hori, and T. Fukagawa. 2016. Chromatin binding of RCC1 during mitosis is important for its nuclear  
500 localization in interphase. *Mol Biol Cell.* 27:371-381.
- 501 Gaglio, T., A. Saredi, and D.A. Compton. 1995. NuMA is required for the organization of microtubules into aster-  
502 like mitotic arrays. *J Cell Biol.* 131:693-708.
- 503 Garrett, S., K. Auer, D.A. Compton, and T.M. Kapoor. 2002. hTPX2 is required for normal spindle morphology and  
504 centrosome integrity during vertebrate cell division. *Curr Biol.* 12:2055-2059.
- 505 Goshima, G., and J.M. Scholey. 2010. Control of mitotic spindle length. *Annu Rev Cell Dev Biol.* 26:21-57.
- 506 Gruss, O.J., R.E. Carazo-Salas, C.A. Schatz, G. Guarguaglini, J. Kast, M. Wilm, N. Le Bot, I. Vernos, E. Karsenti,  
507 and I.W. Mattaj. 2001. Ran induces spindle assembly by reversing the inhibitory effect of importin alpha  
508 on TPX2 activity. *Cell.* 104:83-93.
- 509 Hasegawa, K., S.J. Ryu, and P. Kalab. 2013. Chromosomal gain promotes formation of a steep RanGTP gradient  
510 that drives mitosis in aneuploid cells. *J Cell Biol.* 200:151-161.
- 511 Heald, R., and A. Khodjakov. 2015. Thirty years of search and capture: The complex simplicity of mitotic spindle  
512 assembly. *J Cell Biol.* 211:1103-1111.
- 513 Holubcova, Z., M. Blayney, K. Elder, and M. Schuh. 2015. Human oocytes. Error-prone chromosome-mediated  
514 spindle assembly favors chromosome segregation defects in human oocytes. *Science.* 348:1143-1147.
- 515 Hueschen, C.L., S.J. Kenny, K. Xu, and S. Dumont. 2017. NuMA recruits dynein activity to microtubule minus-  
516 ends at mitosis. *Elife.* 6.
- 517 Joseph, J., S.H. Tan, T.S. Karpova, J.G. McNally, and M. Dasso. 2002. SUMO-1 targets RanGAP1 to kinetochores  
518 and mitotic spindles. *J Cell Biol.* 156:595-602.
- 519 Kalab, P., and R. Heald. 2008. The RanGTP gradient - a GPS for the mitotic spindle. *J Cell Sci.* 121:1577-1586.
- 520 Kalab, P., A. Pralle, E.Y. Isacoff, R. Heald, and K. Weis. 2006. Analysis of a RanGTP-regulated gradient in mitotic  
521 somatic cells. *Nature.* 440:697-701.
- 522 Kiyomitsu, T. 2019. The cortical force-generating machinery: how cortical spindle-pulling forces are generated.  
523 *Curr Opin Cell Biol.* 60:1-8.
- 524 Kiyomitsu, T., and I.M. Cheeseman. 2012. Chromosome- and spindle-pole-derived signals generate an intrinsic  
525 code for spindle position and orientation. *Nat Cell Biol.* 14:311-317.
- 526 Kiyomitsu, T., and I.M. Cheeseman. 2013. Cortical dynein and asymmetric membrane elongation coordinately  
527 position the spindle in anaphase. *Cell.* 154:391-402.
- 528 Kufer, T.A., H.H. Sillje, R. Korner, O.J. Gruss, P. Meraldi, and E.A. Nigg. 2002. Human TPX2 is required for  
529 targeting Aurora-A kinase to the spindle. *J Cell Biol.* 158:617-623.



- 530 Mogessie, B., K. Scheffler, and M. Schuh. 2018. Assembly and Positioning of the Oocyte Meiotic Spindle. *Annu*  
531 *Rev Cell Dev Biol.* 34:381-403.
- 532 Moore, W., C. Zhang, and P.R. Clarke. 2002. Targeting of RCC1 to chromosomes is required for proper mitotic  
533 spindle assembly in human cells. *Curr Biol.* 12:1442-1447.
- 534 Moutinho-Pereira, S., N. Stuurman, O. Afonso, M. Hornsveld, P. Aguiar, G. Goshima, R.D. Vale, and H. Maiato.  
535 2013. Genes involved in centrosome-independent mitotic spindle assembly in *Drosophila* S2 cells. *Proc*  
536 *Natl Acad Sci U S A.* 110:19808-19813.
- 537 Nachury, M.V., T.J. Maresca, W.C. Salmon, C.M. Waterman-Storer, R. Heald, and K. Weis. 2001. Importin beta is  
538 a mitotic target of the small GTPase Ran in spindle assembly. *Cell.* 104:95-106.
- 539 Natsume, T., T. Kiyomitsu, Y. Saga, and M.T. Kanemaki. 2016. Rapid Protein Depletion in Human Cells by Auxin-  
540 Inducible Degron Tagging with Short Homology Donors. *Cell Rep.* 15:210-218.
- 541 Nishimoto, T., E. Eilen, and C. Basilico. 1978. Premature of chromosome condensation in a ts DNA- mutant of  
542 BHK cells. *Cell.* 15:475-483.
- 543 Okumura, M., T. Natsume, M.T. Kanemaki, and T. Kiyomitsu. 2018. Dynein-Dynactin-NuMA clusters generate  
544 cortical spindle-pulling forces as a multi-arm ensemble. *Elife.* 7.
- 545 Petry, S. 2016. Mechanisms of Mitotic Spindle Assembly. *Annu Rev Biochem.* 85:659-683.
- 546 Sackton, K.L., N. Dimova, X. Zeng, W. Tian, M. Zhang, T.B. Sackton, J. Meaders, K.L. Pfaff, F. Sigoillot, H. Yu,  
547 X. Luo, and R.W. King. 2014. Synergistic blockage of mitotic exit by two chemical inhibitors of the  
548 APC/C. *Nature.* 514:646-649.
- 549 Sikirzhyski, V., F. Renda, I. Tikhonenko, V. Magidson, B.F. McEwen, and A. Khodjakov. 2018. Microtubules  
550 assemble near most kinetochores during early prometaphase in human cells. *J Cell Biol.* 217:2647-2659.
- 551 Silk, A.D., A.J. Holland, and D.W. Cleveland. 2009. Requirements for NuMA in maintenance and establishment of  
552 mammalian spindle poles. *J Cell Biol.* 184:677-690.
- 553 Sillje, H.H., S. Nagel, R. Korner, and E.A. Nigg. 2006. HURP is a Ran-importin beta-regulated protein that  
554 stabilizes kinetochore microtubules in the vicinity of chromosomes. *Curr Biol.* 16:731-742.
- 555 Soderholm, J.F., S.L. Bird, P. Kalab, Y. Sampathkumar, K. Hasegawa, M. Uehara-Bingen, K. Weis, and R. Heald.  
556 2011. Importazole, a small molecule inhibitor of the transport receptor importin-beta. *ACS Chem Biol.*  
557 6:700-708.
- 558 Song, L., A. Craney, and M. Rape. 2014. Microtubule-dependent regulation of mitotic protein degradation. *Mol*  
559 *Cell.* 53:179-192.
- 560 Tang, T.K., C.J. Tang, Y.J. Chao, and C.W. Wu. 1994. Nuclear mitotic apparatus protein (NuMA): spindle  
561 association, nuclear targeting and differential subcellular localization of various NuMA isoforms. *J Cell*  
562 *Sci.* 107 ( Pt 6):1389-1402.
- 563 Vassilev, L.T., C. Tovar, S. Chen, D. Knezevic, X. Zhao, H. Sun, D.C. Heimbroad, and L. Chen. 2006. Selective  
564 small-molecule inhibitor reveals critical mitotic functions of human CDK1. *Proc Natl Acad Sci U S A.*  
565 103:10660-10665.
- 566 Walczak, C.E., and R. Heald. 2008. Mechanisms of mitotic spindle assembly and function. *Int Rev Cytol.* 265:111-  
567 158.
- 568 Wiese, C., A. Wilde, M.S. Moore, S.A. Adam, A. Merdes, and Y. Zheng. 2001. Role of importin-beta in coupling  
569 Ran to downstream targets in microtubule assembly. *Science.* 291:653-656.
- 570 Yesbolatova, A., T. Natsume, K.I. Hayashi, and M.T. Kanemaki. 2019. Generation of conditional auxin-inducible  
571 degron (AID) cells and tight control of degron-fused proteins using the degradation inhibitor auxinole.  
572 *Methods.*
- 573 Zierhut, C., and H. Funabiki. 2015. Nucleosome functions in spindle assembly and nuclear envelope formation.  
574 *Bioessays.* 37:1074-1085.
- 575



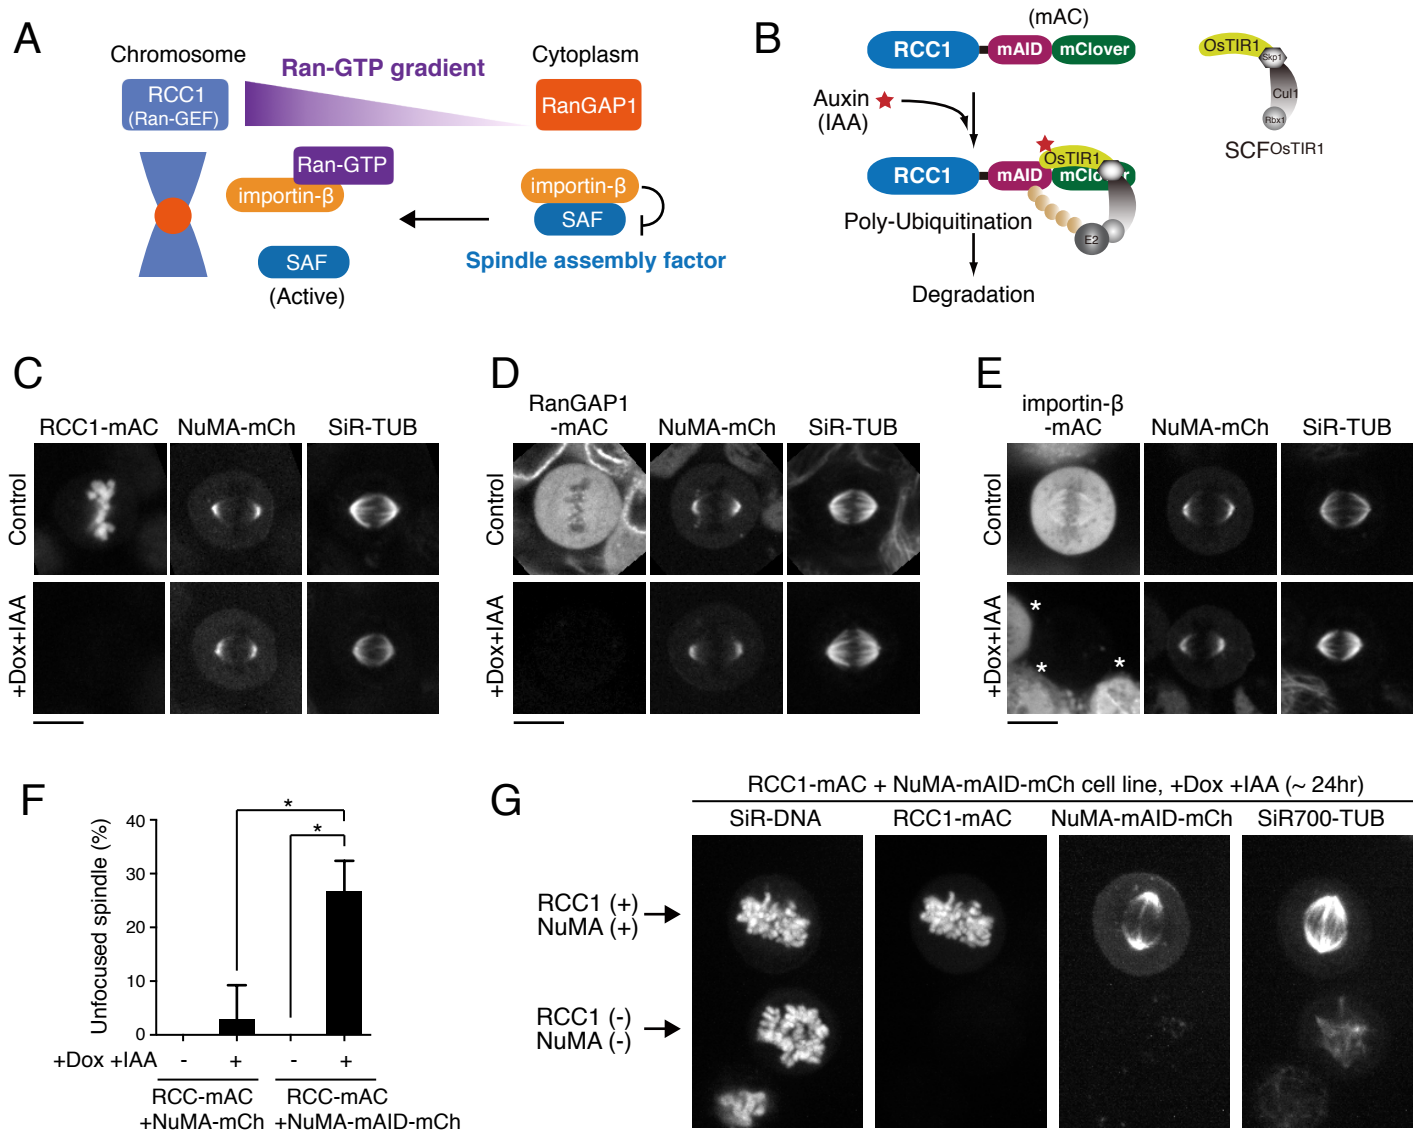

**Figure 1. NuMA localizes at spindle poles and acts for spindle-pole focusing independently of RCC1.**

(A) The prevailing model of the mitotic spindle assembly regulated by Ran-related factors.

(B) Schematic of the auxin-inducible degradation (AID) system.

(C-E) Metaphase RCC1-mAC (C), RanGAP1-mAC (D) or importin-β-mAC cells (E) showing live fluorescent images of mAC-tagged proteins, NuMA-mCherry (mCh), and SiR-TUB after 24 h following Dox and IAA treatment.

\* in E indicates cells with importin-β signals in the presence of Dox and IAA.

(F) Quantification of RCC1-mAC (n = 27, 34) or RCC1-mAC + NuMA-mAID-mCh (n = 37, 113) cells with unfocused spindles in the presence or absence of Dox and IAA, respectively. Bars indicate the mean ± SEM of >4 independent experiments. \* indicates statistical significance as determined by Welch's t-test (p < 0.05).

(G) Live fluorescent images of SiR-DNA, RCC1-mAC, NuMA-mAID-mCherry, and SiR700-TUB in RCC1-mAC and NuMA-mAID-mCh double knock-in cells following 24 h of Dox and IAA treatment. Two cells with or without RCC1 and NuMA signals were analyzed in the same field. Eight z-section images were acquired using 1.0 μm spacing and maximum intensity projection images are shown. Scale bars = 10 μm.

## Figure 2

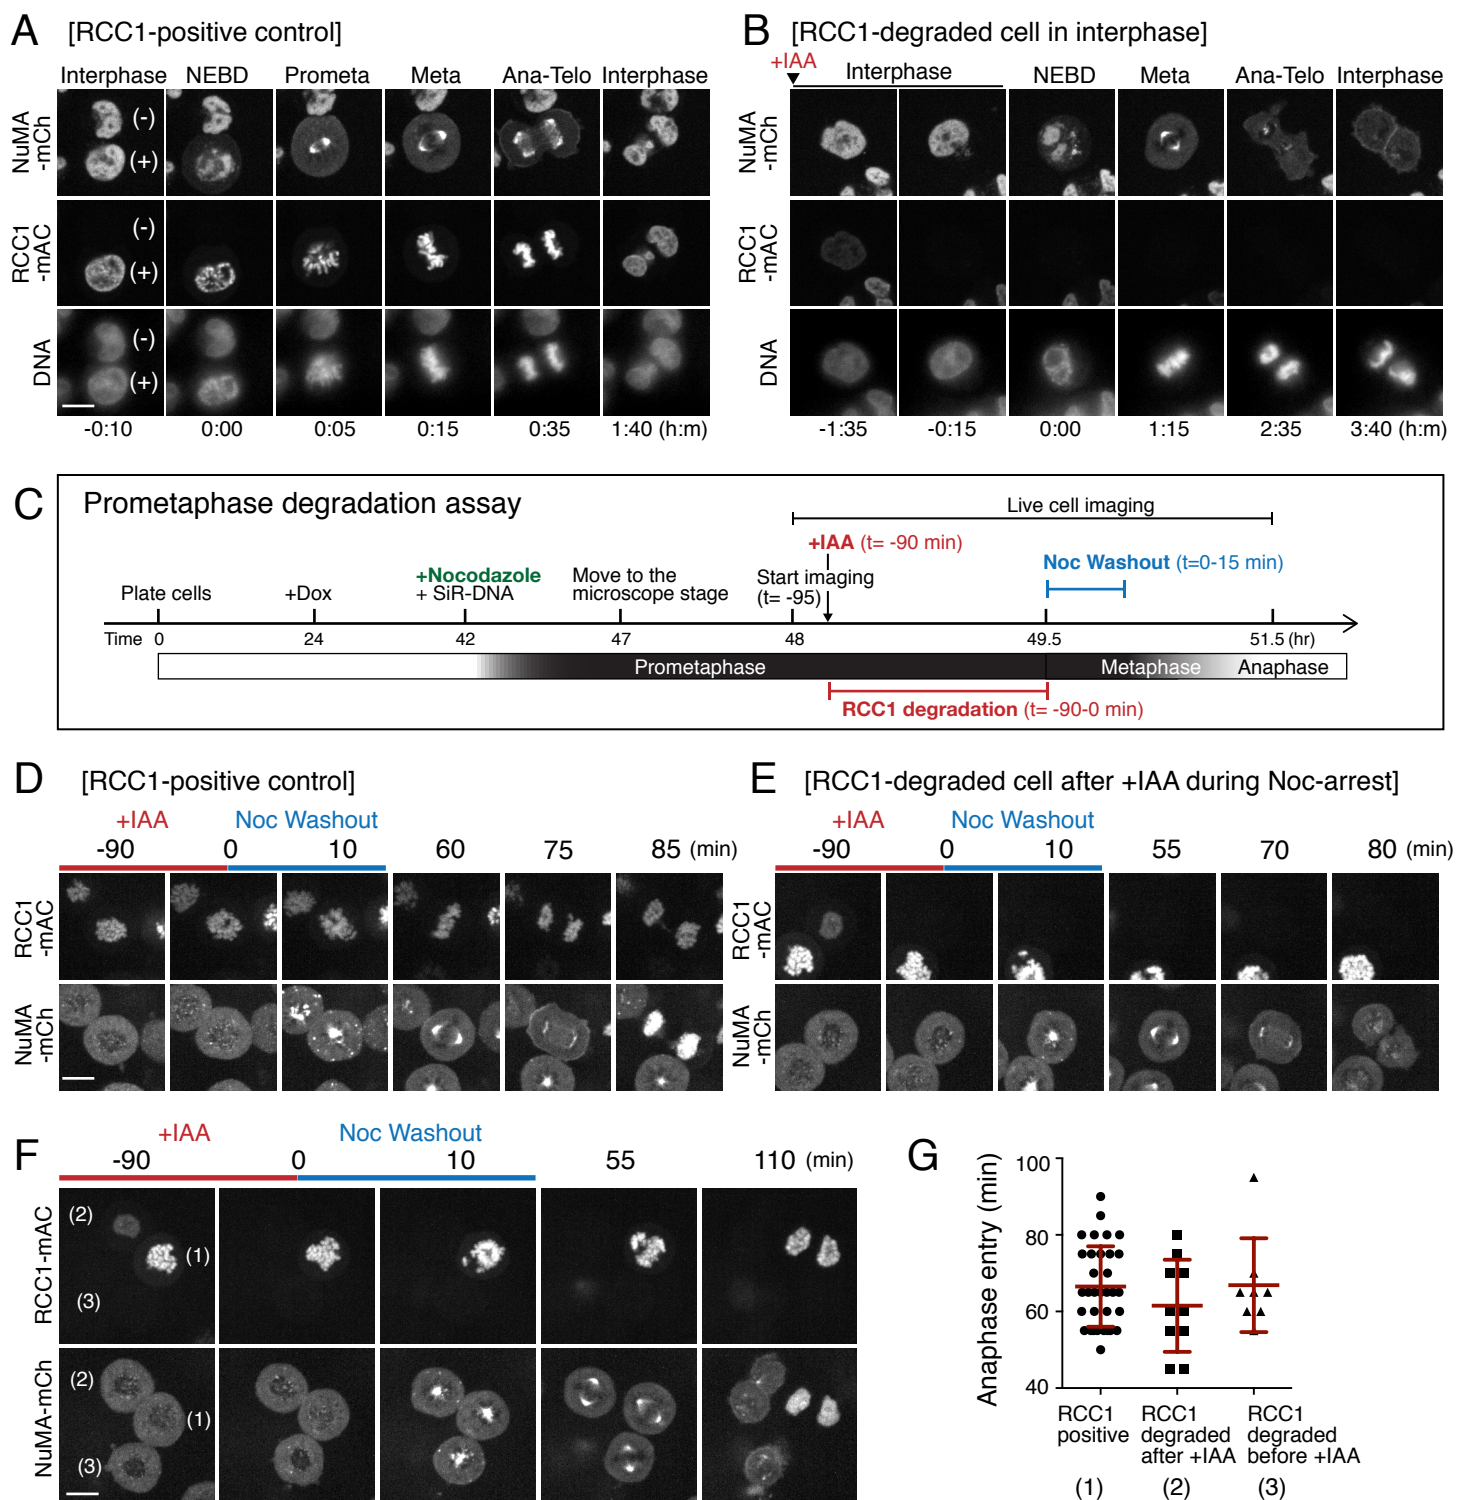

**Figure 2. Acute RCC1 degradation during prometaphase does not substantially affect localization and function of NuMA at the spindle poles.**

(A-B) Live fluorescent images of NuMA-mCh, RCC1-mAC, and DNA (Hoechst 33342 staining) in RCC1-mAC positive (A) and RCC1-depleted (B) cells. Following 21 h of Dox treatment, auxin (IAA) was added and cells were imaged for 6 h. RCC1-positive and -depleted cells are indicated by (+) or (-), respectively, in A. The RCC1 signal was reduced to an undetectable level following IAA treatment during interphase in B. Two z-section images were acquired using 2  $\mu$ m spacing and single z-section images are shown.

## Figure 2

(C) Schematic diagram of the prometaphase degradation assay. Following Dox treatment, a high dose of nocodazole (3.3  $\mu$ M) was added for 6 h to completely disrupt the mitotic spindle and arrest cells in prometaphase. IAA was then added for 90 min (indicated by the red line) to degrade RCC1 during mitosis. Nocodazole was washed away for 15 min (indicated by the light blue line) to initiate mitotic spindle assembly.

(D-E) Live fluorescent images of NuMA-mCh and RCC1-mAC in RCC1 positive (D) and RCC1-depleted cells after IAA treatment (E).

(F) Live fluorescent images of NuMA-mCh and RCC1-mAC in three different cells. RCC1 was not degraded in the cell (1), whereas RCC1-mAC was degraded in the cell (2) or (3) after or before IAA treatment, respectively. A cell identical to (E) is shown as the cell (2) to compare the phenotypes of the three different cell types in the same field.

(G) Scatterplots of anaphase entry time in RCC1 positive cells ( $66.5 \pm 10.5$ ,  $n = 33$ ), RCC1-depleted cells after IAA treatment ( $61.5 \pm 12.0$ ,  $n = 10$ ), and RCC1-depleted cells before IAA treatment ( $66.9 \pm 12.2$ ,  $n = 8$ ). Bars indicate the mean  $\pm$  SD of > 3 independent experiments. Scale bars = 10  $\mu$ m..

## Figure 3

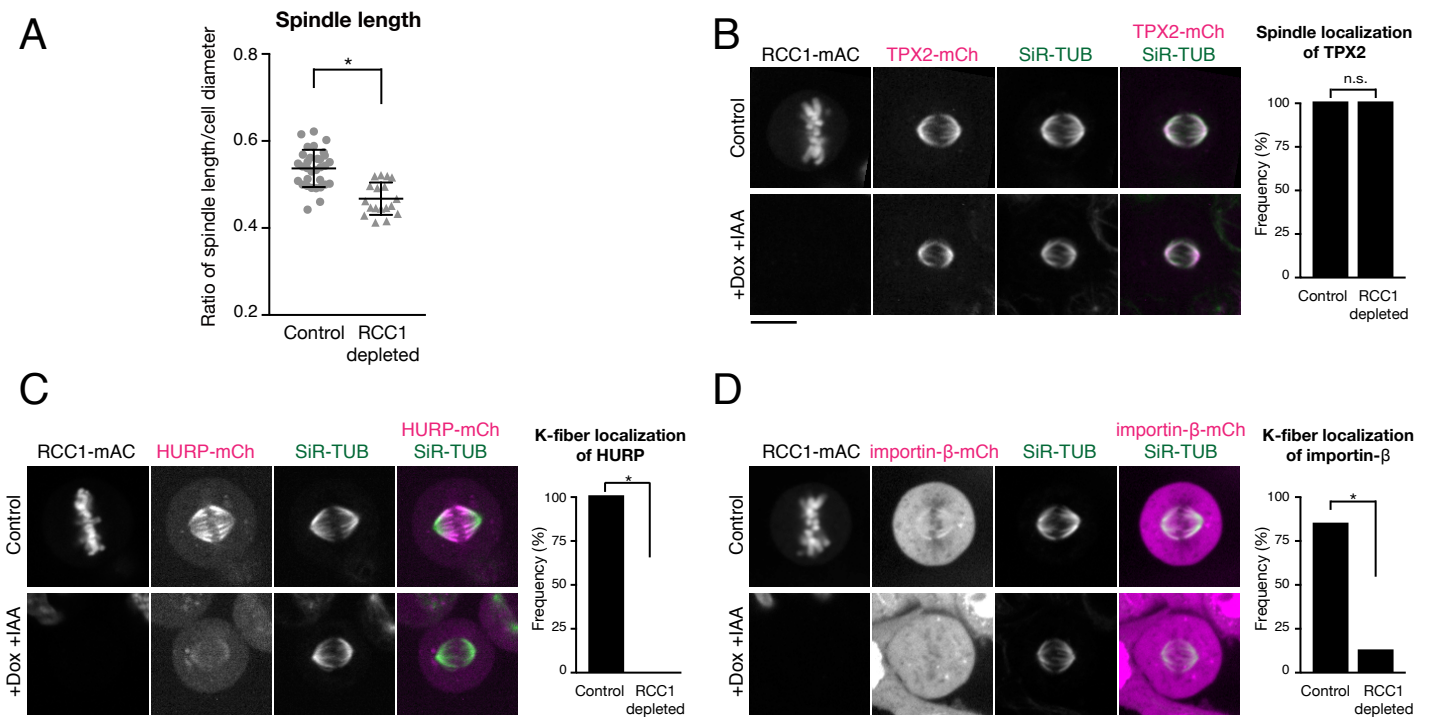

### Figure 3. RCC1 regulates kinetochore-fiber localization of HURP and importin-β.

(A) Scatterplots of the ratio of spindle length and cell diameter in control ( $0.54 \pm 0.04$ ,  $n = 32$ ) and RCC1-depleted ( $0.47 \pm 0.04$ ,  $n = 23$ ) cells. Bars indicate mean  $\pm$  SD from  $>3$  independent experiments. \* indicates statistical significance according to Welch's t-test ( $p < 0.0001$ ).

(B-D) Left: Metaphase RCC1-mAC cells showing live fluorescent images of RCC1-mAC, SiR-TUB and TPX2-mCh (B), HURP-mCh (C), and importin-β-mCh (D) after 24 h following treatment with Dox and IAA. Right: Quantification of spindle or K-fiber localization of TPX2, HURP, or importin-β in control ( $n > 40$ ) and RCC1-depleted ( $n > 40$ ) cells from 3 independent experiments. \* indicates statistical significance according to Z-test (99.9% confidence interval). Scale bars = 10  $\mu$ m.



# Figure 4

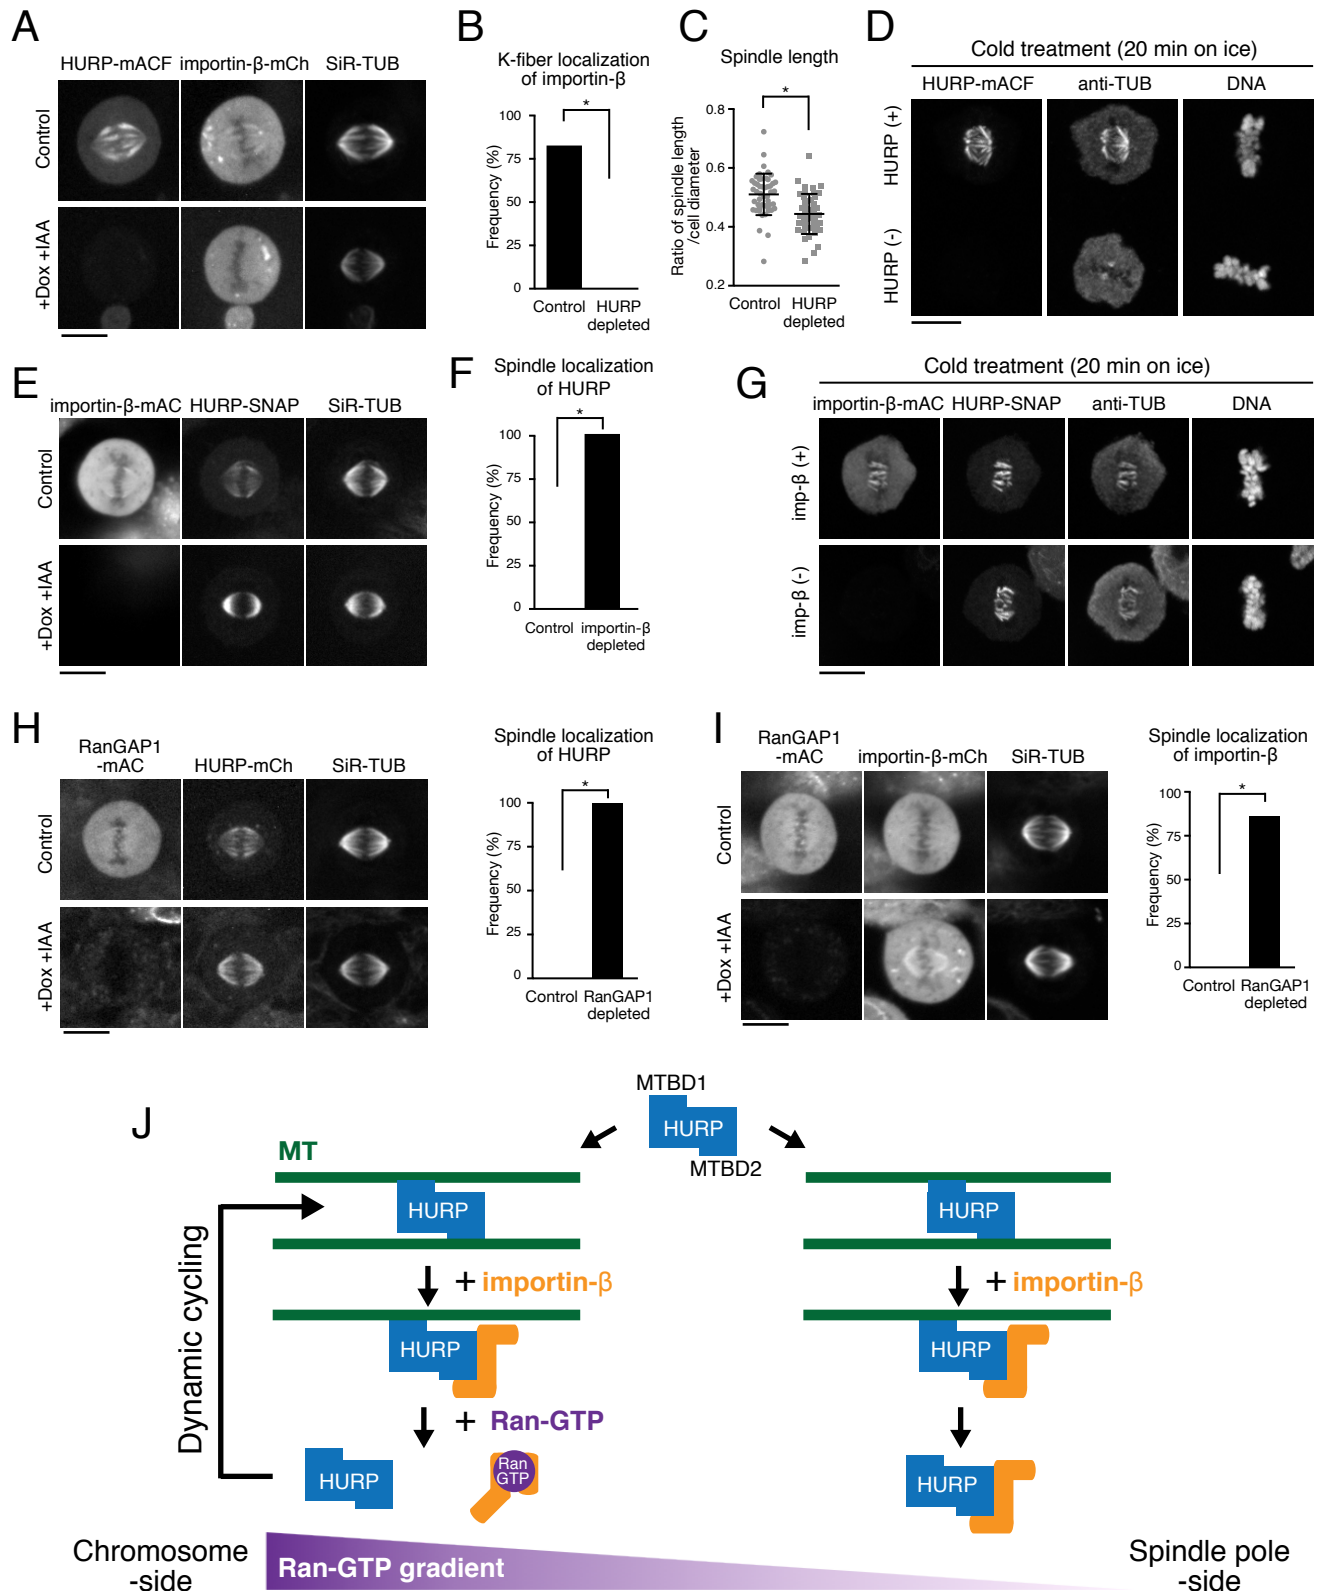

## Figure 4. HURP, but not importin-β, is required to stabilize K-fibers.

(A) Metaphase HURP-mACF cells showing live fluorescent images of HURP-mACF, importin-β-mCh and SiR-TUB after 24 hrs following Dox and IAA treatment.

(B) Quantification of K-fiber localization of importin-β in control (n = 49) and HURP-depleted (n = 46) cells from 3 independent experiments. \* indicates statistical significance according to Z-test (99.9% confidence interval).

(C) Scatterplots of the ratio of spindle length and cell diameter in control ( $0.64 \pm 0.05$ , n = 49) and HURP-depleted ( $0.52 \pm 0.06$ , n = 43) cells. \* indicates statistical significance according to Welch's t-test ( $p < 0.0001$ ).

(D) Fluorescent images of HURP-mACF, TUB, and DNA (Hoechst 33342 staining) in metaphase fixed cells treated with ice-cold medium for 20 min. Two cells with or without HURP signals were analyzed in the same field.

(E) Metaphase importin- $\beta$ -mAC cells showing live fluorescent images of importin- $\beta$ -mAC, HURP-SNAP and SiR-TUB after 24 h following treatment with Dox and IAA.

(F) Quantification of spindle localization of HURP in control (n = 49) and importin- $\beta$ -depleted (n = 43) cells from 3 independent experiments. \* indicates statistical significance according to Z-test (99.9% confidence interval).

(G) Fluorescent images of importin- $\beta$ -mAC, HURP-SNAP, TUB, and DNA (Hoechst 33342 staining) in metaphase fixed cells treated with ice-cold medium for 20 min. Five z-section images were obtained using 0.5  $\mu\text{m}$  spacing and maximum intensity projection images are shown in (D) and (G).

(H-I) Left: metaphase RanGAP1-mAC cells showing live fluorescent images of RanGAP1-mAC, SiR-TUB and HURP-mCh (H) or importin- $\beta$ -mCh (I) after 24 h following Dox and IAA treatment. Right: quantification of K-fiber localization of HURP or importin- $\beta$  in control (n = 45) and RanGAP1-depleted (n > 45) cells from 3 independent experiments. \* indicates statistical significance according to Z-test (99.9% confidence interval). (J) A local cycling model of HURP on K-fibers regulated by Ran-GTP and importin- $\beta$ . See text for details. Scale bars = 10  $\mu\text{m}$ .

## Figure 5

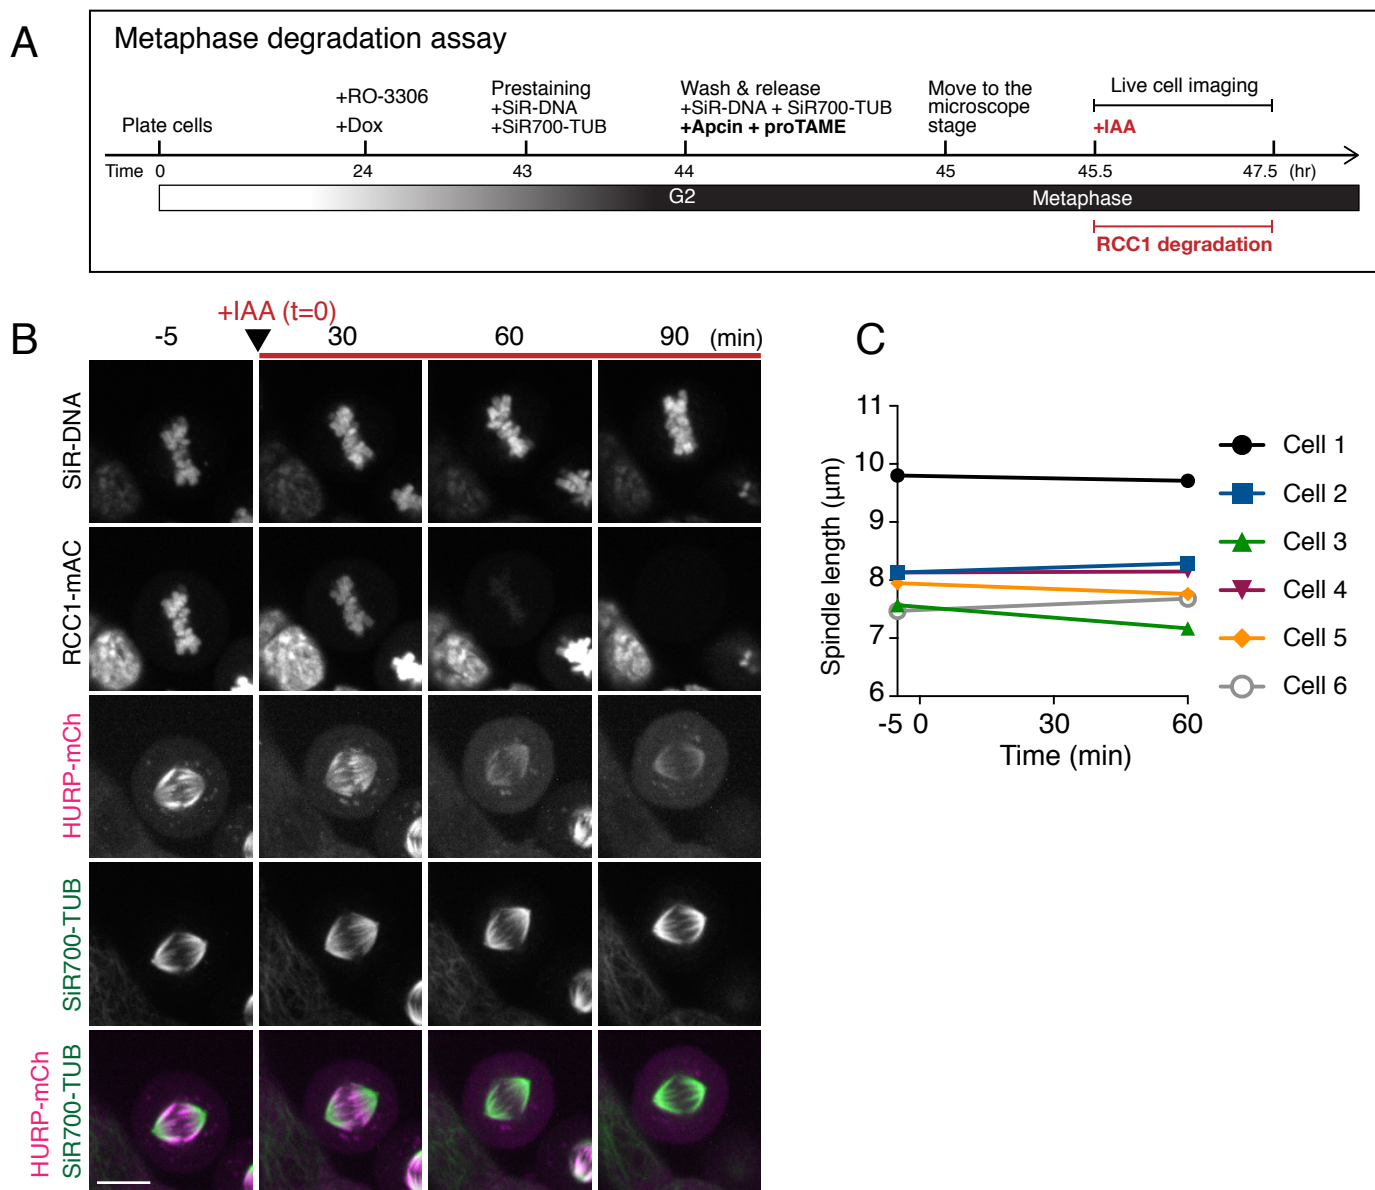

### Figure 5. RCC1 is required to maintain HURP K-fiber accumulation during metaphase.

(A) Schematic diagram of the metaphase degradation assay. Following release from RO-3336-mediated G2 arrest, proTAME and Apcin were added to arrest the cells in metaphase. Auxin (IAA) was added (indicated by the red line) to induce RCC1 degradation during metaphase.

(B) Live fluorescent images of SiR-DNA, RCC1-mAC, NuMA-mCh, and SiR700-TUB showing acute auxin-mediated RCC1 degradation in metaphase-arrested cells.

(C) Spindle length measurement ( $n = 6$ ) at  $t = -5$  and 60 min in (B). Scale bar = 10  $\mu\text{m}$ .

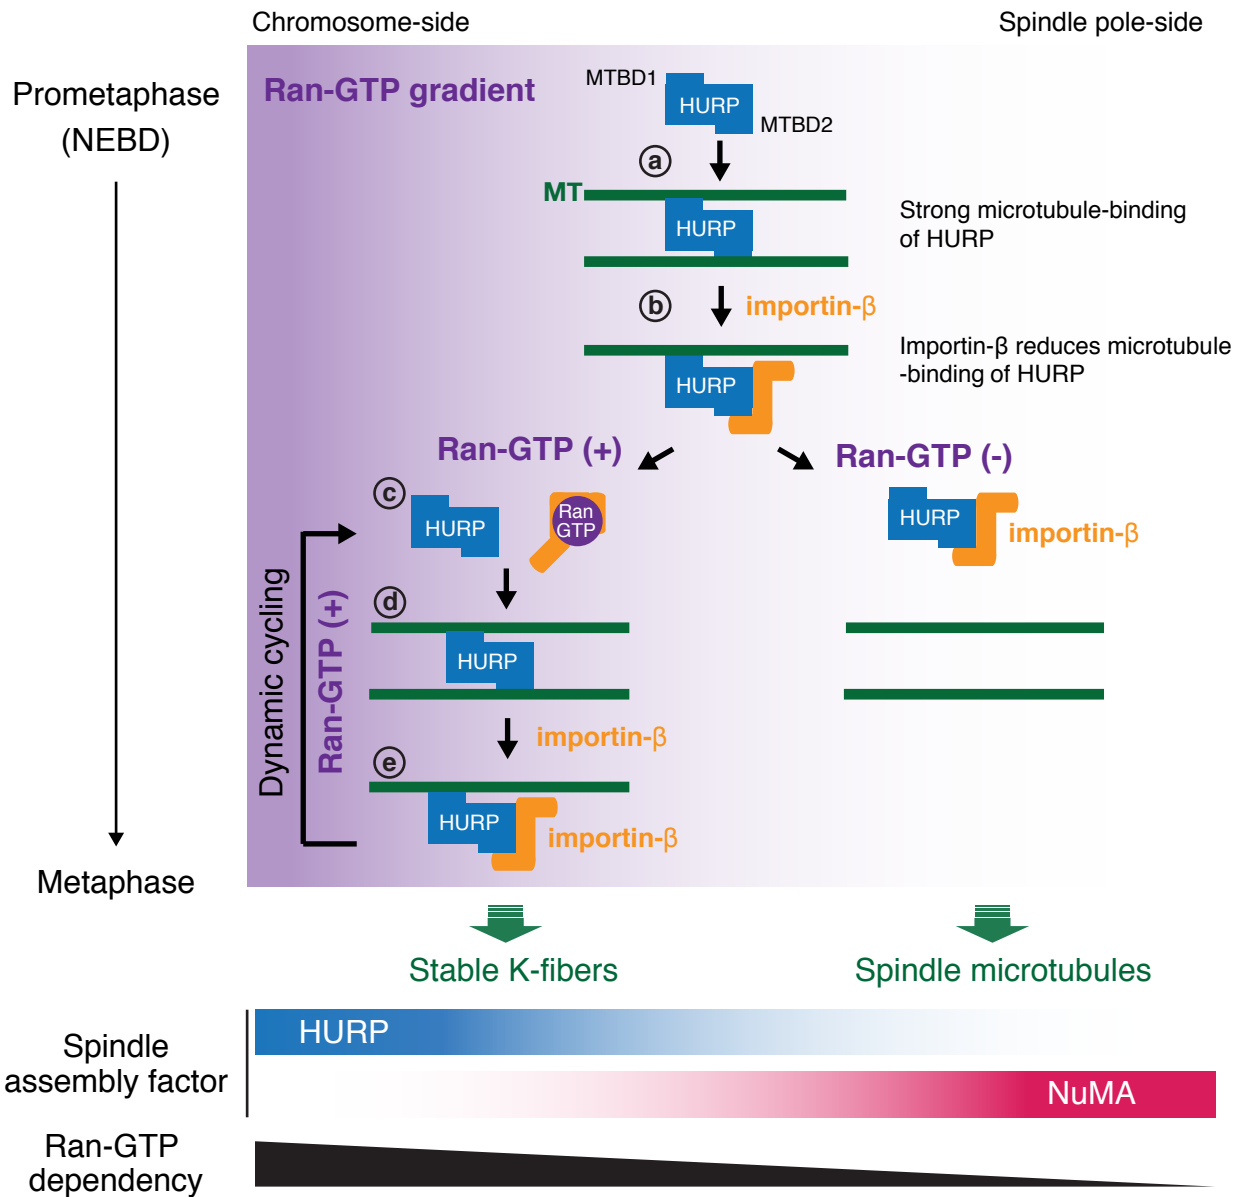

**Figure 6. A local cycling model for the polarization and maintenance of HURP on K-fibers near chromosomes.**

In the vicinity of chromosomes, Ran-GTP and importin-β promote the microtubule binding and dissociation cycle of HURP (c-d-e), resulting in stable HURP-dependent K-fiber formation. Chromosome-derived Ran-GTP regulates the localization of HURP on K-fibers, but not the localization and function of NuMA at the spindle poles in mitotic human cells. See text for details.



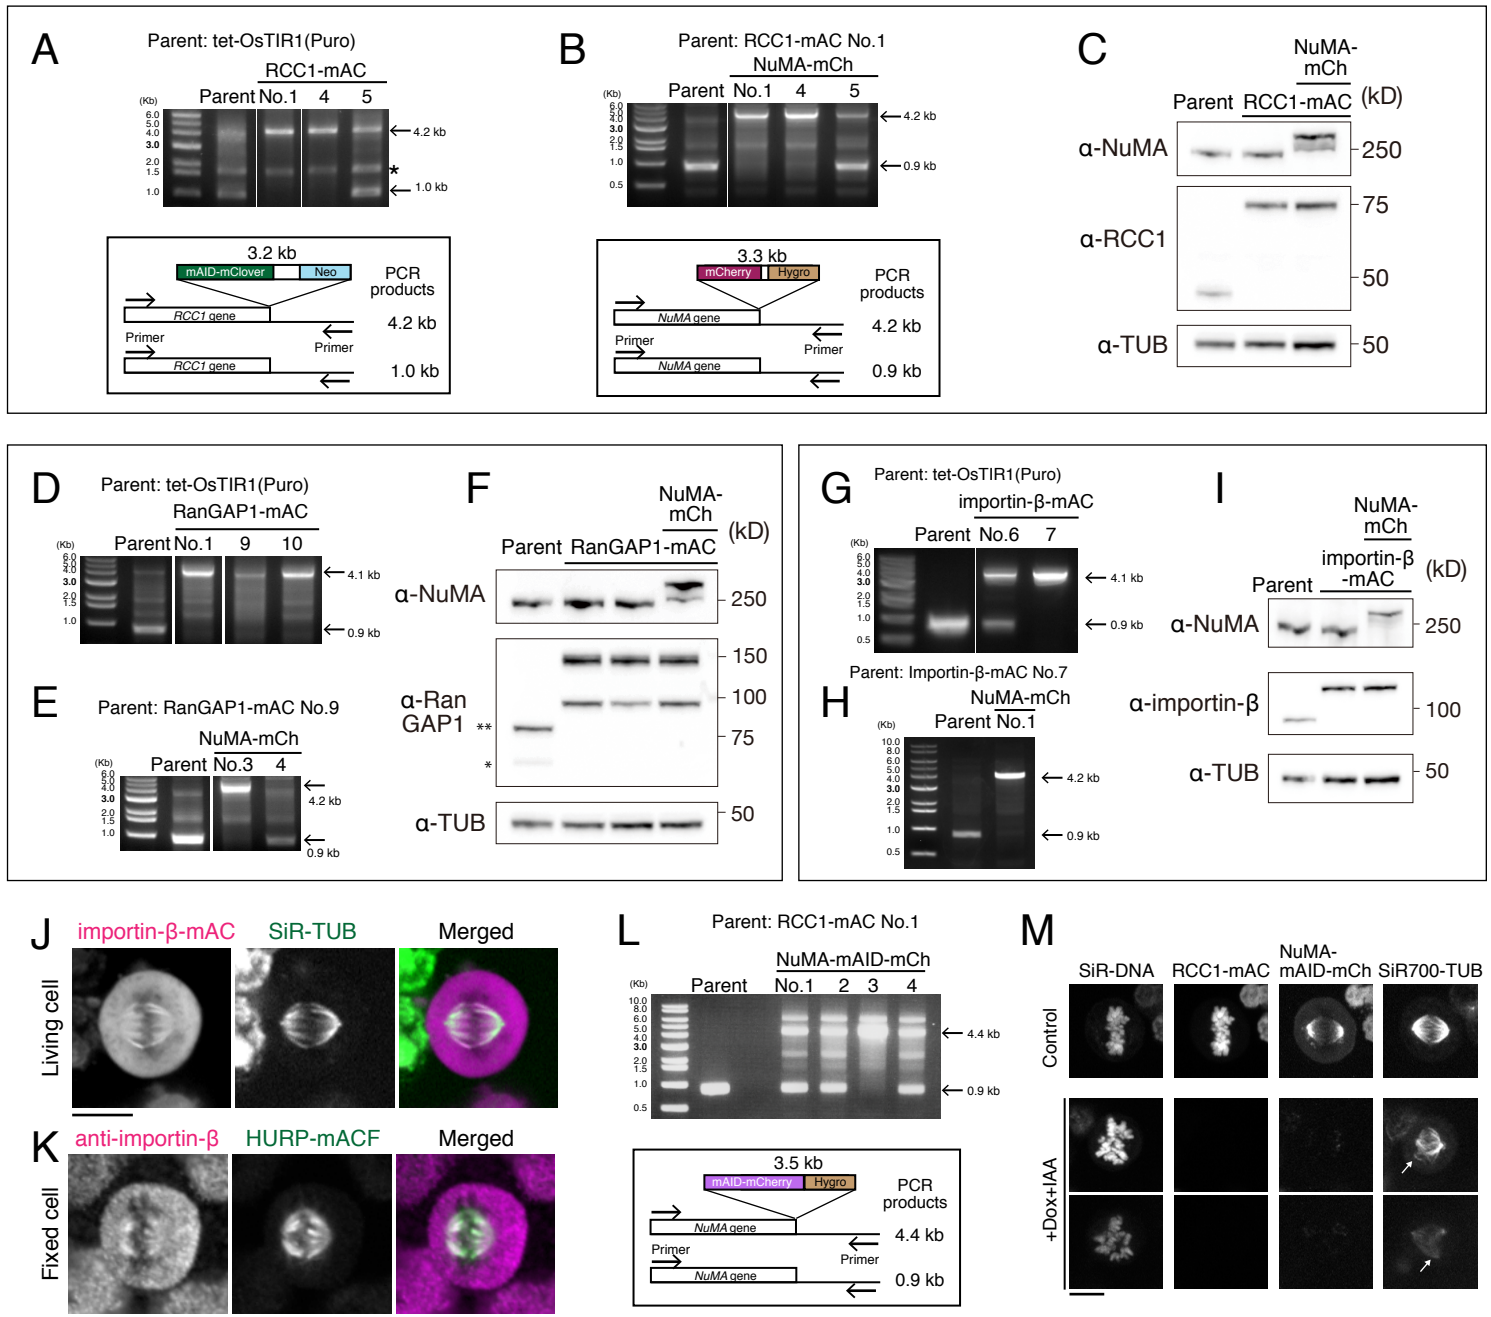

**Figure S1. Generation of cell lines for auxin-induced degradation of endogenous RCC1, RanGAP1, and importin-β.**

(A) Genomic PCR showing clone genotypes after neomycin (Neo) selection. Clone No.1 was used as a parental cell in the second selections. \* indicates a non-specific band.

(B) Genomic PCR showing clone genotypes after hygromycin (Hygro) selection. Clone No.1 was used in this study.

(C) Immunoblotting for anti-NuMA, anti-RCC1 and anti- $\alpha$ -tubulin (TUB, loading control) showing bi-allelic insertion of the indicated tags.

(D) Genomic PCR showing clone genotypes after neomycin (Neo) selection. The clone No.9 was used as a parental cell in the second selections.

(E) Genomic PCR showing clone genotypes after hygromycin (Hygro) selection. The clones No.3 was selected for further use.

(F) Immunoblotting for anti-NuMA, anti-RanGAP1 and anti- $\alpha$ -tubulin (TUB, loading control) showing bi-allelic insertion of the indicated tags. \* and \*\* indicate RanGAP1 and SUMO-1 conjugated RanGAP1, respectively.

(G) Genomic PCR showing clone genotypes after neomycin (Neo) selection. The clone No.7 was used as a parental cell in the second selections.

(H) Genomic PCR showing clone genotype after hygromycin (Hygro) selection. Clone No.1 was selected for further use.

(I) Western blot detection using anti-NuMA, anti-importin- $\beta$  and anti- $\alpha$ -tubulin antibodies (TUB, loading control) showing bi-allelic insertion of the indicated tags.

(J) Metaphase importin- $\beta$ -mAC cells showing live fluorescent images of importin- $\beta$ -mAC, and SiR-TUB. Single z-section images are shown.

(K) Immunofluorescence images of fixed metaphase cells showing K-fiber localization of endogenous importin- $\beta$  and mAID-tagged HURP (HURP-mACF). The maximally projected images from 3 z-sections are shown.

(L) Genomic PCR showing clone genotype after hygromycin (Hygro) selection. Clone No.3 was selected for further use.

(M) Live fluorescent images of SiR-DNA, RCC1-mAC, NuMA-mAID-mCh, and SiR-TUB. A spindle-pole focusing defect (indicated by the arrow in panel 2) and abnormal spindle formation (panel 3) were observed in RCC1-mAC and NuMA-mAID-mCh co-depleted cells 20-24 h after Dox and IAA treatment. Five z-section images were acquired using 1.0  $\mu$ m spacing and maximum intensity projection images are shown. Scale bars = 10  $\mu$ m.

## Supplemental Figure S2

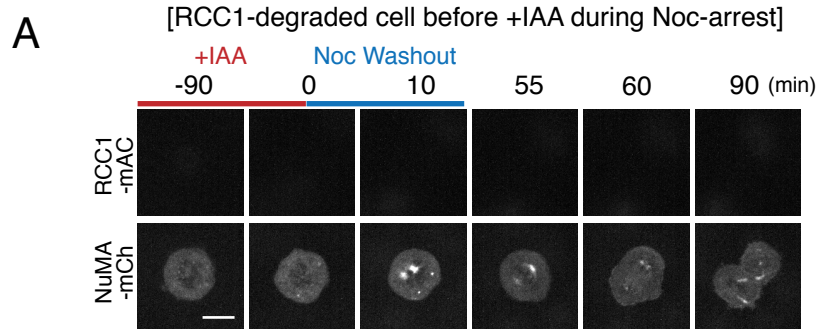

### Figure S2. Phenotypes of RCC1-degraded cells following nocodazole washout.

(A) Live fluorescent images of NuMA-mCh and RCC1-mAC in an RCC1-depleted cell. RCC1 was degraded during nocodazole arrest and before IAA treatment due to basal OsTIR1 activity; however, NuMA localized to the spindle poles and the RCC1-degraded cell exited mitosis as observed in RCC1-positive cells. Two z-section images were acquired using 2  $\mu$ m spacing and maximal intensity projection images are shown. Scale bar = 10  $\mu$ m.

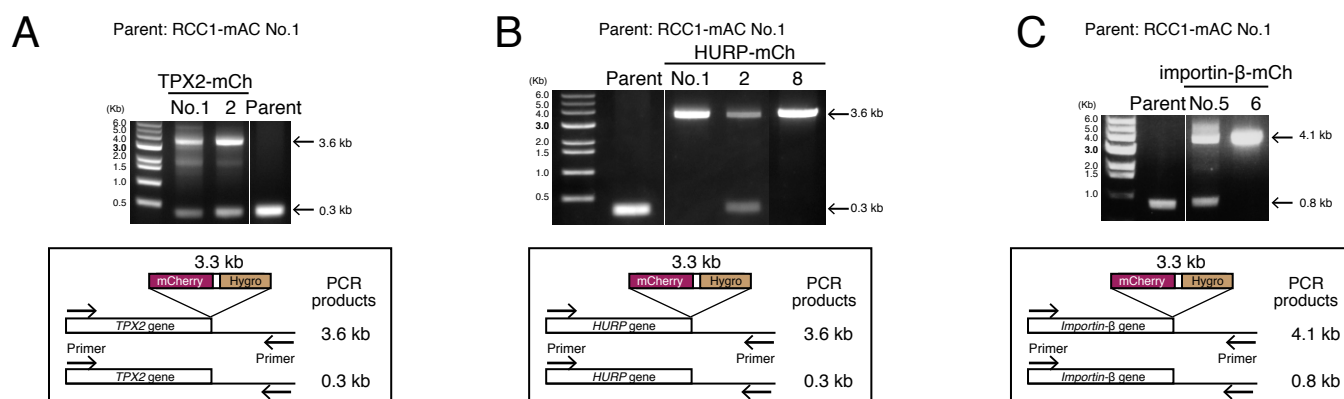

**Figure S3. Generation of double knock-in cell lines that express RCC1-mAC and mCherry-fused TPX2, HURP, or importin-β.** (A-C) Genomic PCRs showing clone genotypes after hygromycin (Hygro) selections. Clones No.1 (A), No. 8 (B), and No.6 (C) were used. The mCherry cassette was inserted into only one copy of TPX2 gene loci (A).

# Supplemental Figure S4

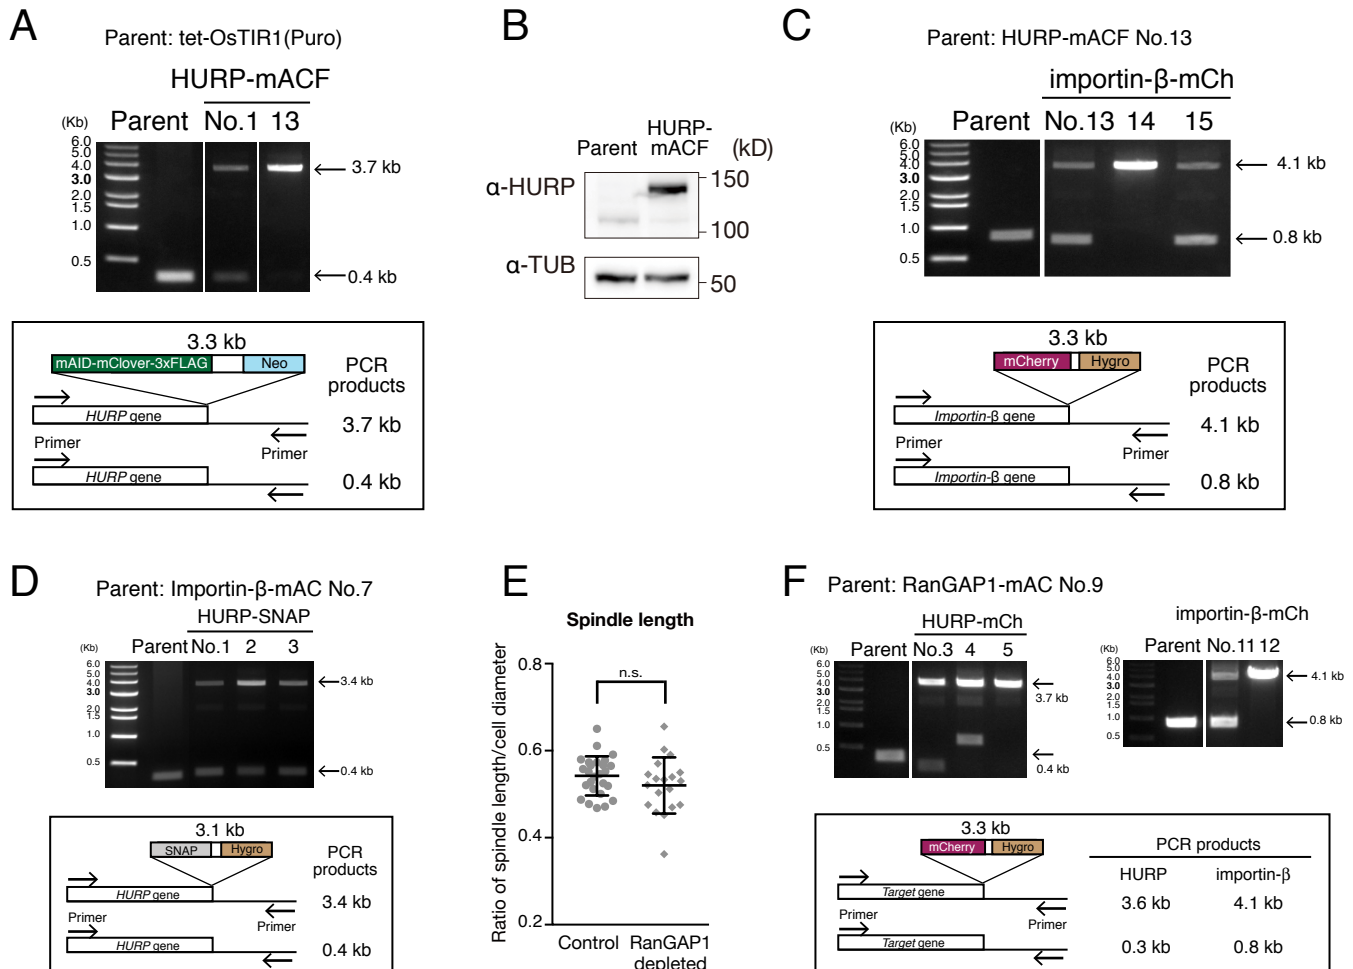

## Figure S4. Generation of cell lines that degrade or visualize endogenous HURP.

(A) Genomic PCR showing clone genotype after neomycin (Neo) selection. Clone No.13 was used as a parental cell in the second selections.

(B) Immunoblotting for anti-HURP and anti- $\alpha$ -tubulin (TUB, loading control) showing bi-allelic insertion of the indicated tags.

(C-D) Genomic PCR showing clone genotypes after hygromycin (Hygro) selection. Clone No.14 (C) and No. 3 (D) were used, respectively.

The SNAP cassette was inserted into only one copy of HURP gene loci (D).

(E) Scatterplots of the ratio of spindle length and cell diameter in control ( $0.54 \pm 0.04$ ,  $n = 26$ ) and RanGAP1-depleted ( $0.52 \pm 0.07$ ,  $n = 19$ ) cells. Bars indicate mean  $\pm$  SD from  $>3$  independent experiments. The differences were not statistically significant based on Welch's t-test in C ( $p = 0.2108$ ).

(F) Genomic PCR showing clone genotypes after hygromycin (Hygro) selection. The clones No.5 (HURP-mCh), and No.12 (importin- $\beta$ -mCh) were used, respectively.
